# Supplementary material for: Parental vitamin deficiency affects the embryonic gene expression of immune-, lipid transport- and apolipoprotein genes
Source: PubMed Central journal article supplement (PMC5059634; doi:10.1038/srep34535), 2016-10-12
Supplement: srep34535-s1.pdf [file srep34535-s1.pdf]

**Supplementary material for:**

**Parental vitamin deficiency affects the embryonic gene expression of immune-, lipid transport- and apolipoprotein genes**

**Kaja H. Skjærven<sup>1\*</sup>, Lars Martin Jakt<sup>2</sup>, John Arne Dahl<sup>3</sup>, Marit Espe<sup>1</sup>, Håvard Aanes<sup>3</sup>, Kristin Hamre<sup>1</sup> and Jorge M.O. Fernandes<sup>2</sup>**

*<sup>1</sup>National Institute of Nutrition and Seafood Research, NIFES, Norway*

*<sup>2</sup>Faculty of Biosciences and Aquaculture, Nord University, Norway*

*<sup>3</sup>Institute of Medical Microbiology, Oslo University Hospital, Norway*

\*Corresponding author:

Dr. Kaja Helvik Skjærven

National Institute of Nutrition and Seafood Research (NIFES),

PO Box 2029 Nordnes,

5817 Bergen, Norway

Tel.: +4741458362; fax: +4755905299.

E-mail address: [ksk@nifes.no](mailto:ksk@nifes.no)

Supplementary figures:

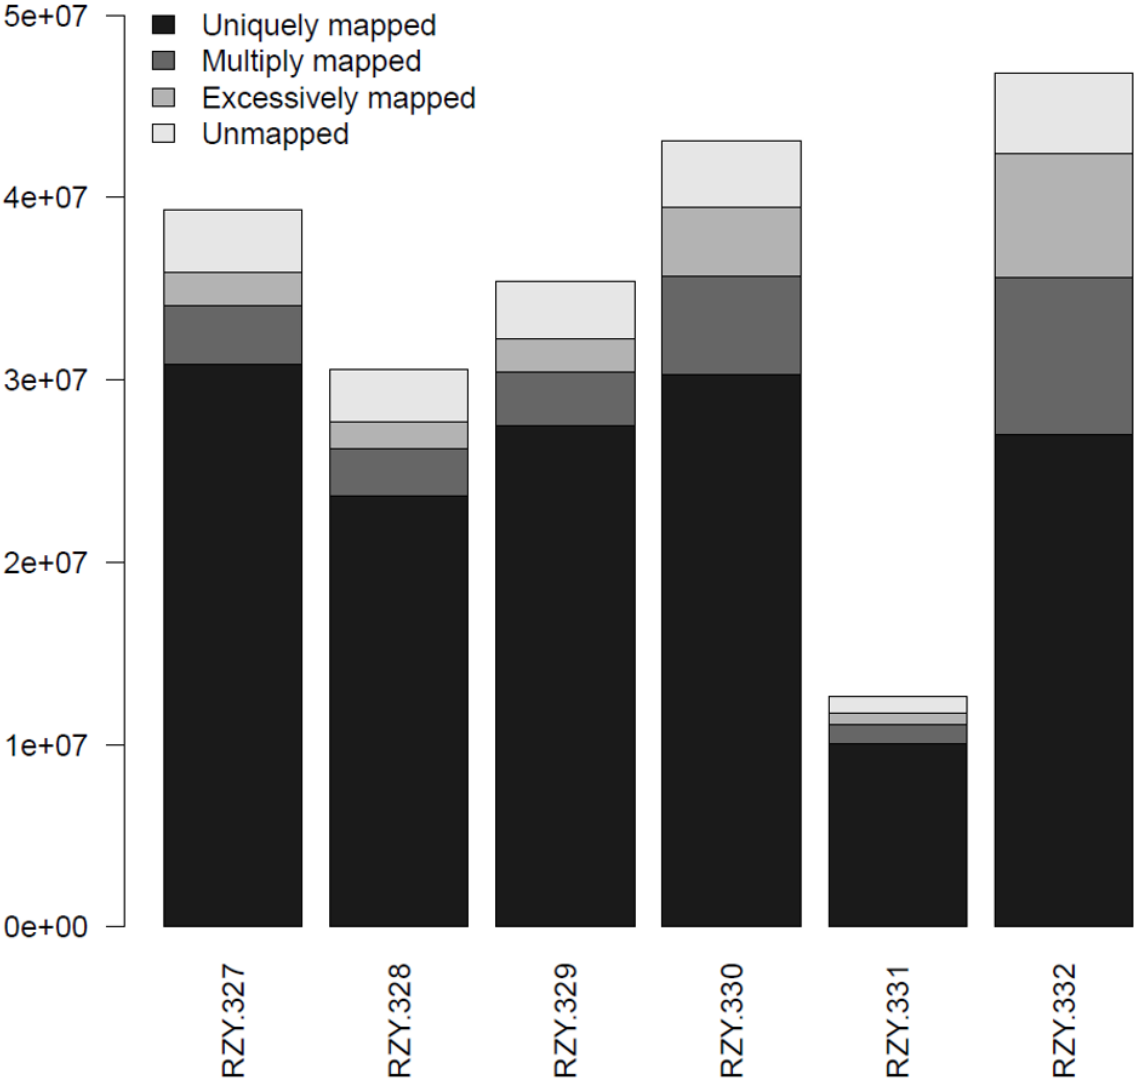

**Figure S1: Mapping statistics from STAR for Illumina Hi-sequencing** run indicating total reads, uniquely mapped and excessively mapped reads for each of the three independent samples from each feeding group. Low 1-C: RZY.327-329, Control: RZY.330-332.

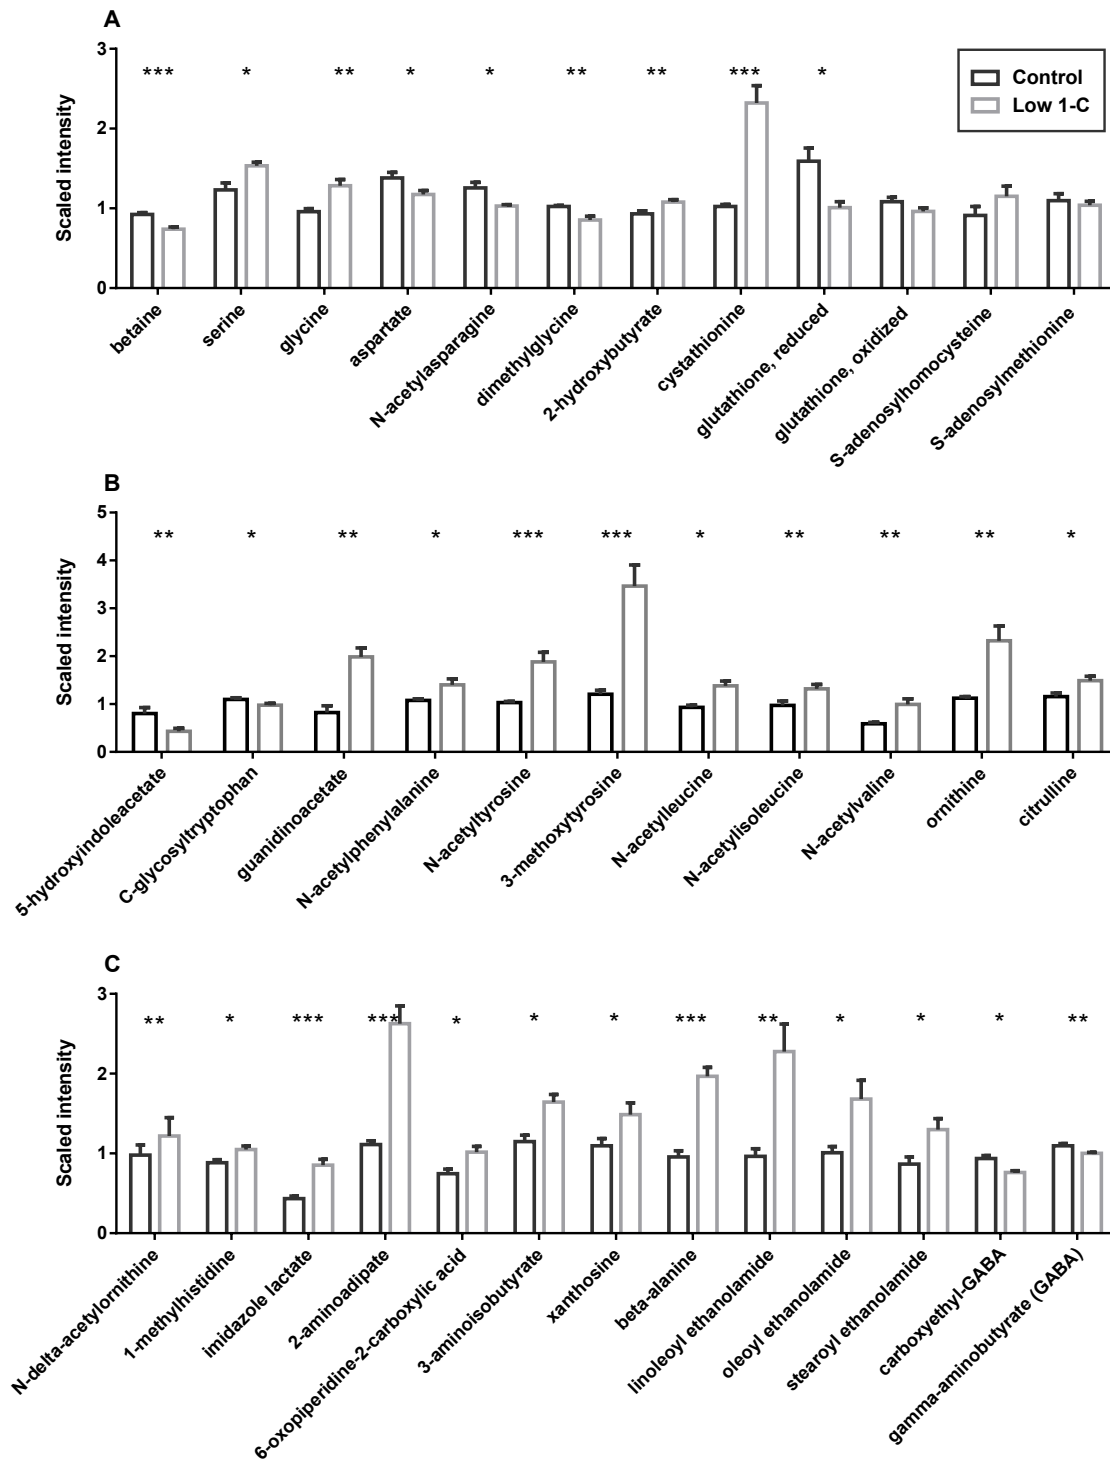

**Figure S2: F<sub>0</sub> metabolic profiling of significantly altered metabolites zebrafish (44 DPF) fed control or low 1-C diet. A:** Scaled intensity of metabolites involved in the 1-C pathway. Oxidized glutathione, S-adenosylhomocysteine, and S-adenosylmethionine were not significantly altered. **B:** Scaled intensity of significantly altered metabolites related to amino acid metabolism and **C:** related to amino acid (continuation from B), endocannabinoid (linoleoyl-, oleoyl- and stearoyl ethanolamide) and neurotransmitter (gamma-aminobutyrate (GABA) and carboxyethyl-GABA) metabolism and regulation. Values represent pooled samples of 20 fish from 6 independent tanks from each diet. Significant differences between feed groups are marked by asterisks (\* =  $p < 0.05$ , \*\* =  $p < 0.01$ , \*\*\* =  $p < 0.001$ ). For pathway enrichment, fold changes, and q-values see Table S3, for pathway classification network interactions of amino acids, see Fig. 3.

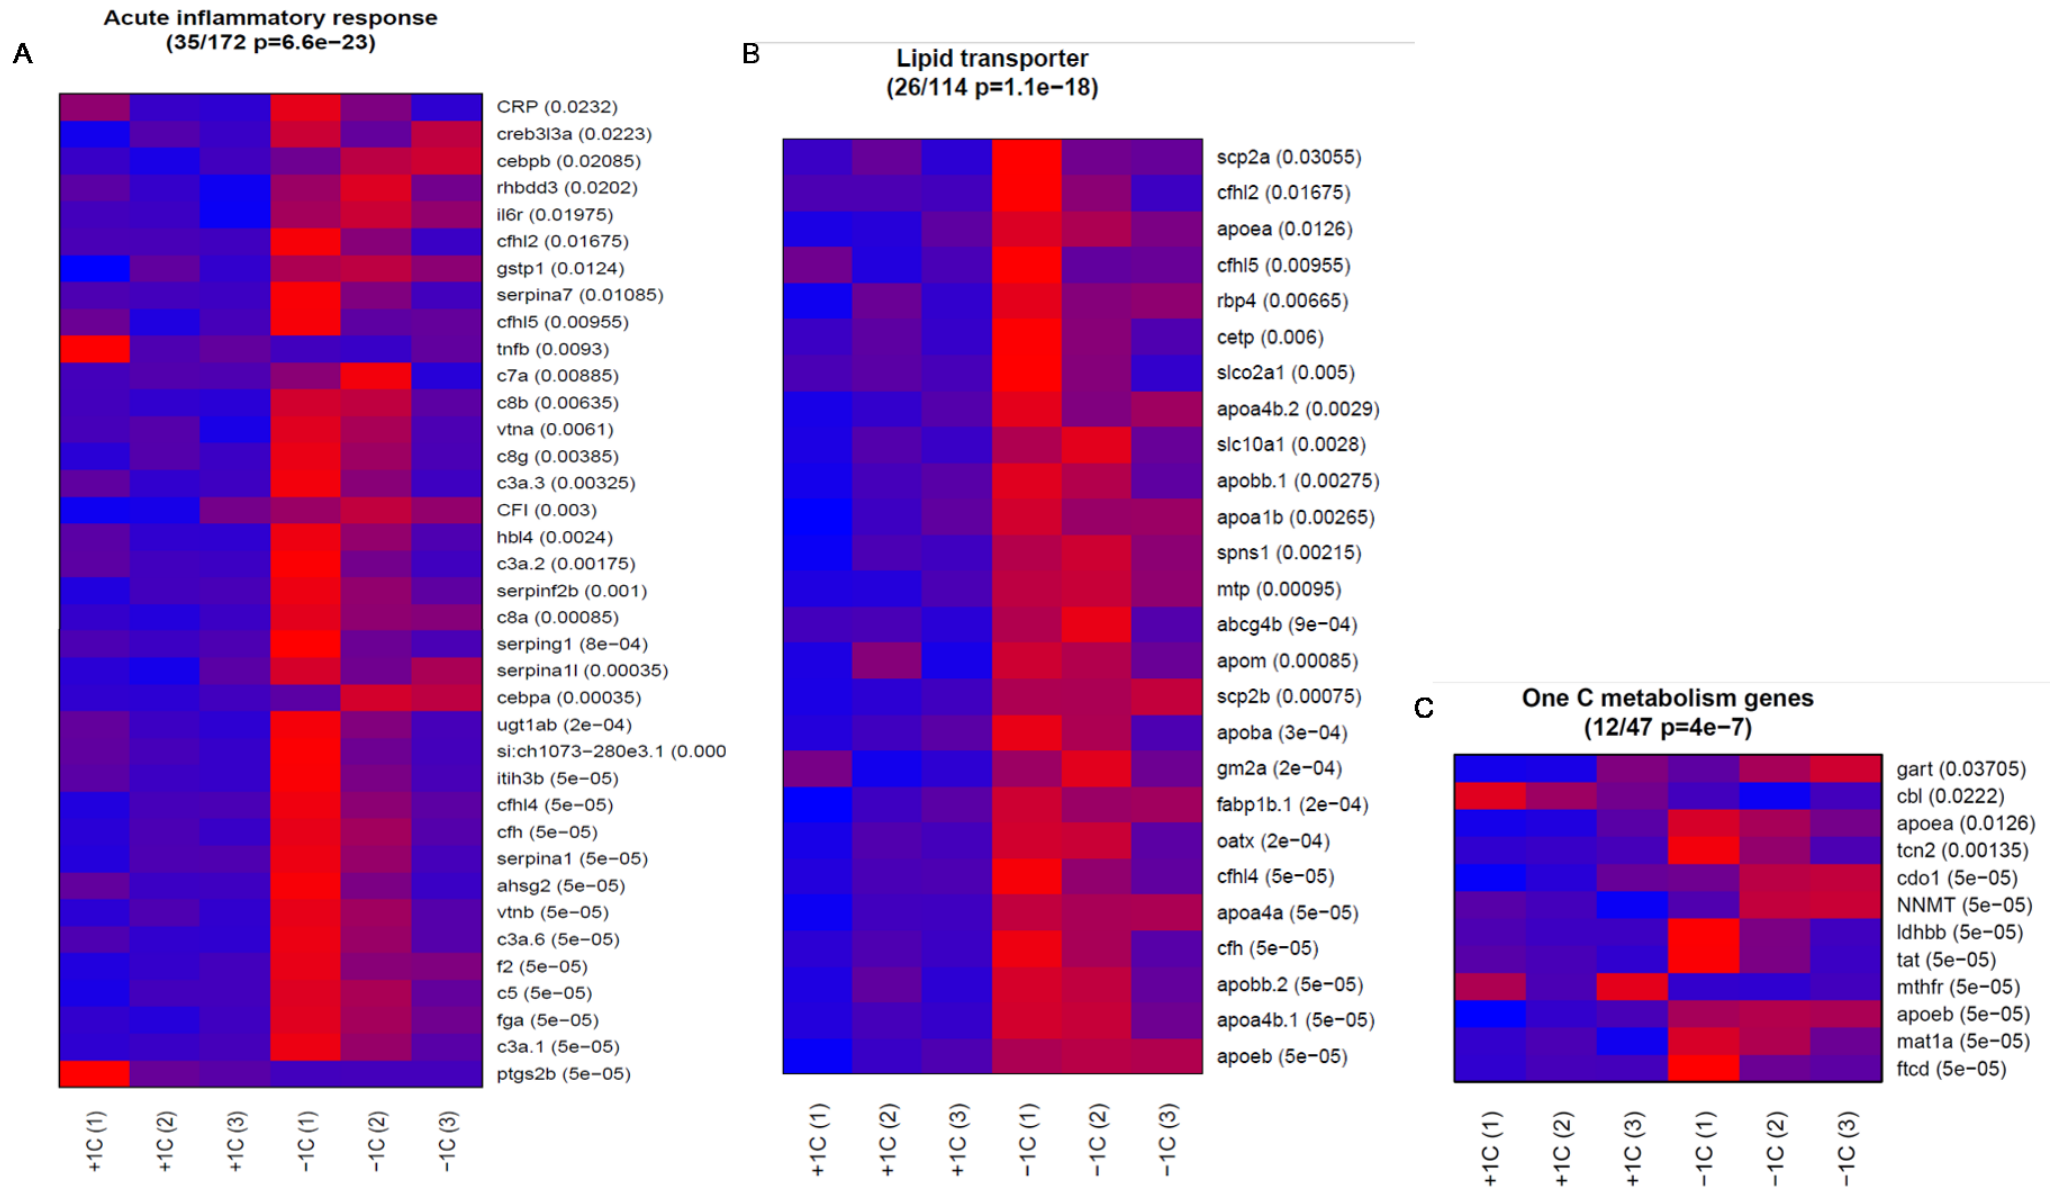

**Figure S3: Gene expression of significant GO terms affected from control (+1C) and low 1-C (-1C) F<sub>1</sub> embryos.** **A:** 35 significantly affected transcripts from the Acute inflammatory response GO term, **B:** 26 significantly affected transcripts from the Lipid transporter GO term **C:** 12 significantly affected transcripts from the 1-C metabolism genes. Expression levels are indicated by colour codes, with blue to red indicating min to max expression level for each gene, respectively. Each row of the heat map with its given gene name ID displays gene expression level of differentially expressed genes. P-values are indicated next to the gene names.

**Oxidation-reduction process  
(119/1148 p=6.6e-25)**

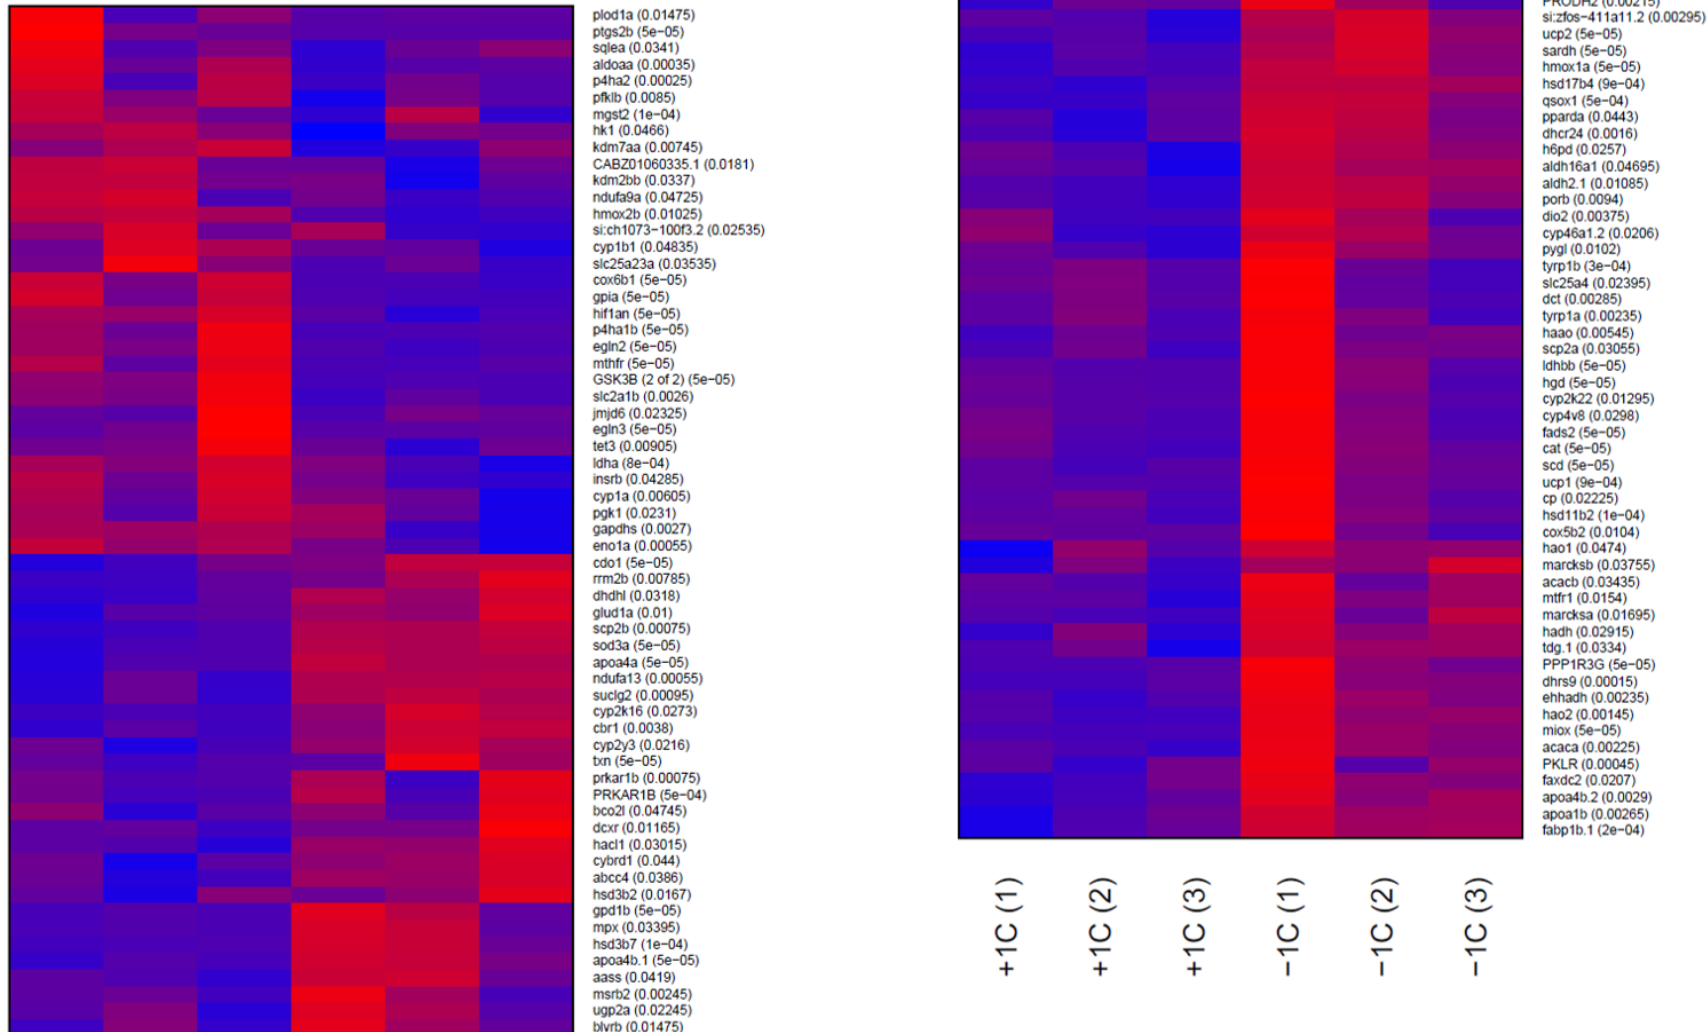

**Figure S4: Significantly affected transcripts in low 1-C embryos compared to control embryos from the oxidation-reduction process GO term.** In total 119 transcripts were differentially expressed in control (+1C) and low 1-C (-1C) F<sub>1</sub> embryos. Expression levels are indicated by colour codes, with blue to red indicating min to max expression level for each gene, respectively. Each row of the heat map with its given gene name ID displays gene expression level of differentially expressed genes. P-values are indicated next to the gene names.

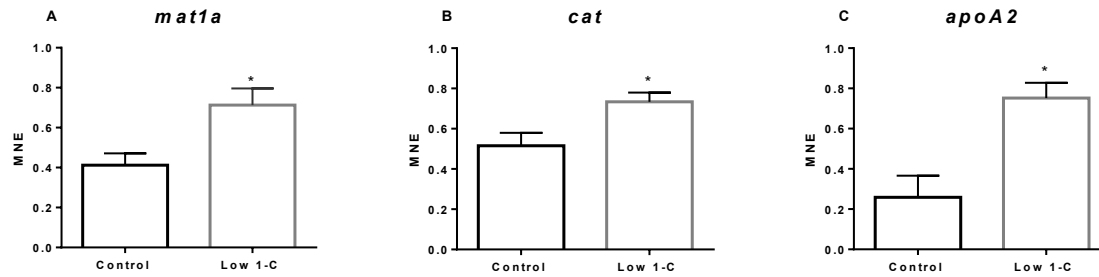

**Figure S5: RNA sequencing verification by RT-qPCR.** mRNA levels presented as mean normalized expression (MNE) in control embryos versus low 1-C embryos. MNE of target genes are normalized against *ef1a* and *tuba1* as reference genes. All data points presented are the means  $\pm$  SD of 3 independent groups (egg incubation groups originating from independent parents from different feeding tanks) of 30 embryos at 26 somite stage. Significant differences are marked by asterisk (\* =  $p < 0.05$ ). Gene abbreviations, name and accession number are given in table S2.

## Supplementary tables:

**Table S1:** Standard procedures for zebrafish mating, handling and feeding used for both F<sub>0</sub> and F<sub>1</sub> generations.

| Days post fertilization | Incubation devise          | Incubation medium           | Number of individuals | Special handling                                                                     | Feed                                    |      |                     |           |
|-------------------------|----------------------------|-----------------------------|-----------------------|--------------------------------------------------------------------------------------|-----------------------------------------|------|---------------------|-----------|
|                         |                            |                             |                       |                                                                                      | Artemia concentrate (μL)                |      | Gemma Micro 70 (mg) |           |
|                         |                            |                             |                       |                                                                                      | morning                                 | noon | morning             | afternoon |
| 0-2.5                   | Petri dish (80mm)*         | E3 **                       | 120                   | Rinse eggs in E3, remove dead eggs                                                   |                                         |      |                     |           |
| 2.5 - 4                 | Petri dish (80mm)*         | E3                          | 120                   | Change 80% of the water every day                                                    |                                         |      |                     |           |
| 4 - 5                   | Beakers 250 (mL)*          | 100mL E3                    | 60                    | Transfer to beakers                                                                  |                                         |      |                     |           |
| 5 - 7                   | Beakers 250 (mL)*          | 100mL E3                    | 60                    | Start feeding Gemma Micro                                                            |                                         |      | 10                  | 10        |
| 7 - 10                  | Beakers 250 (mL)*          | 200mL E3                    | 60                    | Start feeding artemia                                                                | 100                                     |      | 10                  | 10        |
| 10 - 15                 | 1.5L Aquatic Habitat tanks | 0.5L E3 + 0.5L System water | 60                    | Transfer to system tanks. Add additional 0.5L system water/day                       | 400                                     | 400  | 40                  | 40        |
| 15 - 27                 | 3L Aquatic Habitat tanks   | System water                | 60                    | Turn on system circulation, low speed. Gradually increase circulation speed each day | 600                                     | 600  | 60                  | 60        |
| 27                      | 3L Aquatic Habitat tanks   | System water                | 60                    | Start feeding experimental diets                                                     | Experimental diets: Control and Low 1-C |      |                     |           |

\* The embryos and larvae were kept in an incubator at 28.5°C and 12/12h light and dark cycles

\*\* E3 medium: <https://wiki.zfin.org/display/prot>

**Table S2:** Gene abbreviation, gene name, gene bank accession number, forward and reverse primer sequence, primer amplicon size and qRT-PCR efficiency for selected reference and target genes analysed.

| Gene abbr.              | Gene name                                      | Accession no. | Forward primer (5' - 3') | Reverse primer (5' - 3') | Amplicon size (bp) | PCR eff. |
|-------------------------|------------------------------------------------|---------------|--------------------------|--------------------------|--------------------|----------|
| <b>Reference genes:</b> |                                                |               |                          |                          |                    |          |
| <i>ef1α</i>             | <i>Elongation factor 1 α</i>                   | NM_131263.1   | AGACAACCCCAAGGCTCTCA     | CTCATGTCACGCACAGCAAA     | 126                | 1,99     |
| <i>tuba1</i>            | <i>tubulin, alpha 1c</i>                       | NM_001105126  | GGTGCCCTCAATGTGGATCT     | GCCACAGAGAGCTGCTCATG     | 131                | 2,06     |
| <b>Target genes:</b>    |                                                |               |                          |                          |                    |          |
| <i>mat1a</i>            | <i>methionine adenosyltransferase 1, alpha</i> | NM_199871     | CGGCTCATCGGAAAAAACAG     | GACCATAGCAGGCGGTGTTC     | 131                | 2,12     |
| <i>cat</i>              | <i>catalase</i>                                | NM_130912     | ACTACCAGTCAACTGCCCGTA    | GAAGAACGTGCGCACTTGGG     | 226                | 1,99     |
| <i>apoA2</i>            | <i>apolipoprotein A-II</i>                     | NM_001130586  | TTCTTGCACTCCAAGTGCAGT    | CCCTTAGTGCTGGCTCAAC      | 131                | 2,01     |



**Table S3:** Main pathway and sub pathway enrichment analysis showing metabolites affected by dietary 1-C deficiency in F<sub>0</sub>.

| Main Pathway Name       | Main Pathway Enrichment (K*/M*)/(n/N) | Sub Pathway Name                               | Compounds In Pathway |                           | Sub Pathway Enrichment (k/m)/(n/N) | Statistically significant (p<0.05) metabolites affected (fold changes of Low 1-C / control). q-values ( <b>bold</b> metabolite name indicate q-value < 0.1, others < 0.3) |
|-------------------------|---------------------------------------|------------------------------------------------|----------------------|---------------------------|------------------------------------|---------------------------------------------------------------------------------------------------------------------------------------------------------------------------|
|                         |                                       |                                                | Significant (k)      | Detected (m)              |                                    |                                                                                                                                                                           |
| Amino acid              | 2,39                                  | Alanine and Aspartate Metabolism               | 2                    | 6                         | 3,9                                | aspartate (-0.85), N-acetylasparagine (-0.82)                                                                                                                             |
|                         |                                       | Glycine, Serine and Threonine Metabolism       | 4                    | 9                         | 5,2                                | <b>betaine</b> (-0.80), serine (+1.25) glycine (+1.34),                                                                                                                   |
|                         |                                       | Tryptophan Metabolism                          | 2                    | 6                         | 3,9                                | 5-hydroxyindoleacetate (-0.54), C-glycosyltryptophan (-0.89)                                                                                                              |
|                         |                                       | Creatine Metabolism                            | 1                    | 4                         | 2,9                                | <b>guanidinoacetate</b> (+2.41)                                                                                                                                           |
|                         |                                       | Phenylalanine and Tyrosine Metabolism          | 3                    | 13                        | 2,7                                | N-acetylphenylalanine (+1.30), <b>N-acetyltyrosine</b> (+1.84), <b>3-methoxytyrosine</b> (+2.87)                                                                          |
|                         |                                       | Leucine, Isoleucine and Valine Metabolism      | 4                    | 21                        | 2,2                                | <b>N-acetylleucine</b> (+1.48), N-acetylisoleucine (+1.36), N-acetylvaline (+1.69), alpha-hydroxyisovalerate (-0.76)                                                      |
|                         |                                       | Glutamate Metabolism                           | 2                    | 11                        | 2,1                                | gamma-aminobutyrate (GABA) (-0.91), <b>carboxyethyl-GABA</b> (-0.81)                                                                                                      |
|                         |                                       | Urea cycle; Arginine and Proline Metabolism    | 3                    | 17                        | 2,1                                | ornithine (+2.07), citrulline (+1.29), <b>N-delta-acetylornithine</b> (+1.58)                                                                                             |
|                         |                                       | Methionine, Cysteine, SAM, Taurine Metabolism  | 3                    | 18                        | 2,0                                | <b>methionine sulfone</b> (+2.31), <b>cystathionine</b> (+2.27), 2-hydroxybutyrate (+1.16)                                                                                |
|                         |                                       | Histidine Metabolism                           | 2                    | 13                        | 1,8                                | 1-methylhistidine (+1.19), <b>imidazole lactate</b> (+1.96)                                                                                                               |
|                         |                                       | Lysine Metabolism                              | 2                    | 13                        | 1,8                                | <b>2-aminoadipate</b> (+2.36), 6-oxopiperidine-2-carboxylic acid (+1.36)                                                                                                  |
|                         |                                       | Glutathione Metabolism                         | 1                    | 8                         | 1,5                                | glutathione, reduced (GSH) (-0.69)                                                                                                                                        |
| Vitamins                | 1,67                                  | Vitamin B6 Metabolism                          | 4                    | 4                         | 11,8                               | <b>pyridoxamine</b> (-0.39), <b>pyridoxamine phosphate</b> (-0.51), <b>pyridoxal</b> (-0.36), pyridoxate (-0.34)                                                          |
| Nucleotide              | 0,61                                  | Pyrimidine Metabolism, Thymine containing      | 1                    | 5                         | 2,4                                | 3-aminoisobutyrate (+1.43)                                                                                                                                                |
|                         |                                       | Purine Metabolism, Xanthine/Inosine containing | 1                    | 11                        | 1,1                                | xanthosine (+1.35)                                                                                                                                                        |
|                         |                                       | Pyrimidine Metabolism, Uracil containing       | 1                    | 11                        | 1,1                                | <b>beta-alanine</b> (+2.06)                                                                                                                                               |
| Lipid                   | 0,54                                  | Fatty Acid Metabolism (Acyl Choline)           | 1                    | 1                         | 11,8                               | palmitoylcholine (-0.72)                                                                                                                                                  |
|                         |                                       | Endocannabinoid                                | 3                    | 8                         | 4,4                                | oleoyl ethanolamide (+1.67), stearoyl ethanolamide (+1.50), <b>linoleoyl ethanolamide</b> (+2.36)                                                                         |
|                         |                                       | Fatty Acid, Dicarboxylate                      | 2                    | 11                        | 2,1                                | maleate (-0.76), <b>undecanedioate</b> (-0.59)                                                                                                                            |
|                         |                                       | Fatty Acid Metabolism(Acyl Carnitine)          | 1                    | 13                        | 0,9                                | myristoleylcarnitine (-0.57)                                                                                                                                              |
|                         |                                       | Sphingolipid Metabolism                        | 1                    | 22                        | 0,5                                | palmitoyl dihydrosphingomyelin, d18:0/16:0 (-0.75)                                                                                                                        |
|                         |                                       | Lysolipid                                      | 1                    | 30                        | 0,4                                | 1-linoleoyl-GPA ,18:2 (+1.40)                                                                                                                                             |
| Phospholipid Metabolism | 1                                     | 36                                             | 0,3                  | choline phosphate (-0.85) |                                    |                                                                                                                                                                           |
| Peptide                 | 0,48                                  | Gamma-glutamyl Amino Acid                      | 1                    | 12                        | 1,0                                | gamma-glutamylglycine (+1.60)                                                                                                                                             |
| Carbohydrate            | 0,26                                  | Nucleotide Sugar                               | 1                    | 6                         | 2,0                                | UDP-N-acetylglucosamine (-0.86)                                                                                                                                           |

48

**N**: total number of detected metabolites (566), **n**: total number of metabolites affected by the diet (48), **M**: number of detected metabolites of main pathway, **m**: number of detected metabolites of sub pathway, **K**: number of metabolites affected by diet in main pathway, **k**: number of metabolites affected by diet in sub pathway. The diet effect is indicated as fold changes, positive and negative values indicate higher and lower intensity in low 1-C group than control, respectively (log<sub>2</sub>(low 1-C/ctl)). Q-values < 0.1 are indicated with bold metabolite name.

**Table S4:** Complete list of 364 differentially expressed genes in low 1-C embryos compared to control embryos.  
Attached separately as excel file

| gene_id             | gene              | locus                | sample_1 | sample_2 | status | value_1  | value_2 | log2.fold_change. | test_stat | p_value | q_value    | significant |
|---------------------|-------------------|----------------------|----------|----------|--------|----------|---------|-------------------|-----------|---------|------------|-------------|
| ENSDARG00000094023  | si:dkeyp-79f4.1   | 4:23401768-23402535  | low1C    | ctl      | OK     | 0,536847 | 0       | #NAVN?            | NA        | 0,00015 | 0,01096    | yes         |
| ENSDARG00000082452  | U4                | 17:23328304-23328445 | low1C    | ctl      | OK     | 0        | 26,0438 | Inf               | NA        | 0,00005 | 0,00421538 | yes         |
| ENSDARG00000098549  | U6                | 4:62994355-62994462  | low1C    | ctl      | OK     | 0        | 60,9421 | Inf               | NA        | 0,00005 | 0,00421538 | yes         |
| ENSDARG00000083431  | U4                | 25:5213091-5213232   | low1C    | ctl      | OK     | 0        | 15,1922 | Inf               | NA        | 0,00095 | 0,0464045  | yes         |
| ENSDARG00000062788  | irg1l             | 14:11121037-11124596 | low1C    | ctl      | OK     | 1,34071  | 18,992  | 3,82432           | 4,89773   | 0,00005 | 0,00421538 | yes         |
| ENSDARG00000052468  | GSK3B (2 of 2)    | 1:48726128-48765129  | low1C    | ctl      | OK     | 0,54925  | 6,25321 | 3,50906           | 2,73127   | 0,00005 | 0,00421538 | yes         |
| ENSDARG00000081108  | U5                | 20:48779134-48779250 | low1C    | ctl      | OK     | 113,134  | 1105,32 | 3,28836           | 4,57588   | 0,00005 | 0,00421538 | yes         |
| ENSDARG000000104919 | si:ch211-153b23.3 | 14:11124781-11132075 | low1C    | ctl      | OK     | 0,232334 | 2,2227  | 3,25804           | 5,27163   | 0,00005 | 0,00421538 | yes         |
| ENSDARG00000032553  | egln3             | 17:9755991-9780871   | low1C    | ctl      | OK     | 2,98372  | 21,5616 | 2,85328           | 5,85144   | 0,00005 | 0,00421538 | yes         |
| ENSDARG00000082424  | U4                | 17:23315576-23315717 | low1C    | ctl      | OK     | 38,3838  | 258,38  | 2,75092           | 3,38882   | 0,0001  | 0,00772511 | yes         |
| ENSDARG000000100756 | U1                | 3:9152925-9153074    | low1C    | ctl      | OK     | 21,8371  | 130,994 | 2,58465           | 2,7727    | 0,0009  | 0,0447093  | yes         |
| ENSDARG00000075339  | ipp               | 2:3152162-3180676    | low1C    | ctl      | OK     | 2,00597  | 11,7599 | 2,5515            | 4,84989   | 0,00005 | 0,00421538 | yes         |

|                    |                   |                      |       |     |    |          |         |         |         |         |            |     |
|--------------------|-------------------|----------------------|-------|-----|----|----------|---------|---------|---------|---------|------------|-----|
| ENSDARG00000101135 | si:dkey-85k7.7    | 7:21592998-21608008  | low1C | ctl | OK | 2,0592   | 11,9117 | 2,53223 | 6,75768 | 0,00005 | 0,00421538 | yes |
| ENSDARG00000103481 | Metazoa_SR P      | 11:12239840-12240137 | low1C | ctl | OK | 2,59553  | 14,9127 | 2,52244 | 2,81522 | 0,00025 | 0,0166061  | yes |
| ENSDARG00000062562 | eglIn2            | 15:8359528-8406926   | low1C | ctl | OK | 0,207955 | 1,18353 | 2,50876 | 4,10033 | 0,00005 | 0,00421538 | yes |
| ENSDARG00000084991 | SNORA62           | 3:6151961-6152097    | low1C | ctl | OK | 32,3272  | 182,879 | 2,50007 | 2,64479 | 0,00065 | 0,0365333  | yes |
| ENSDARG00000103556 | si:ch211-218g23.6 | 11:29487411-29489914 | low1C | ctl | OK | 0,357233 | 1,9715  | 2,46436 | 3,4497  | 0,00005 | 0,00421538 | yes |
| ENSDARG00000081192 | U5                | 20:23333589-23333704 | low1C | ctl | OK | 2693,83  | 14588,8 | 2,43713 | 7,36884 | 0,00005 | 0,00421538 | yes |
| ENSDARG00000077169 | si:ch211-153b23.4 | 14:11144483-11150710 | low1C | ctl | OK | 0,441944 | 2,35856 | 2,41597 | 4,6661  | 0,00005 | 0,00421538 | yes |
| ENSDARG00000105097 | Metazoa_SR P      | 11:11400211-11400509 | low1C | ctl | OK | 4,65037  | 23,8692 | 2,35974 | 3,34461 | 0,00005 | 0,00421538 | yes |
| ENSDARG00000101489 | U1                | 4:41438317-41438482  | low1C | ctl | OK | 20,5643  | 104,113 | 2,33993 | 2,79481 | 0,0005  | 0,0292267  | yes |
| ENSDARG00000102181 | Metazoa_SR P      | 11:11477184-11477481 | low1C | ctl | OK | 2,07019  | 10,4767 | 2,33935 | 2,64741 | 0,0009  | 0,0447093  | yes |
| ENSDARG00000091996 | si:ch211-117m20.5 | 5:30014378-30015748  | low1C | ctl | OK | 0,741185 | 3,67089 | 2,30823 | 3,14501 | 0,00005 | 0,00421538 | yes |
| ENSDARG00000089617 | RNaseP_nuc        | 2:37844278-37844581  | low1C | ctl | OK | 29,3689  | 145,299 | 2,30666 | 5,40585 | 0,00005 | 0,00421538 | yes |
| ENSDARG00000086105 | Vault             | 14:2489384-2489489   | low1C | ctl | OK | 2410,5   | 11863,1 | 2,29907 | 6,16995 | 0,00005 | 0,00421538 | yes |
| ENSDARG00000085497 | RNaseP_nuc        | 2:42737319-42737617  | low1C | ctl | OK | 17,2493  | 82,4628 | 2,25721 | 4,54862 | 0,00005 | 0,00421538 | yes |
| ENSDARG00000034211 | capn2l            | 22:26617034-26646980 | low1C | ctl | OK | 0,221269 | 1,05428 | 2,25238 | 3,28174 | 0,00005 | 0,00421538 | yes |

|                    |                     |                      |       |     |    |         |         |         |         |         |                |     |
|--------------------|---------------------|----------------------|-------|-----|----|---------|---------|---------|---------|---------|----------------|-----|
| ENSDARG0000098933  | Metazoa_SR<br>P     | 11:12245901-12632880 | low1C | ctl | OK | 14,7642 | 67,6417 | 2,19581 | 3,36491 | 0,00005 | 0,00421<br>538 | yes |
| ENSDARG0000089313  | U4                  | 4:14728262-14737845  | low1C | ctl | OK | 1470,95 | 6735,93 | 2,19513 | 3,02495 | 0,00025 | 0,01660<br>61  | yes |
| ENSDARG0000056376  | ankrd37             | 1:17002488-17005836  | low1C | ctl | OK | 3,15399 | 14,3074 | 2,18151 | 5,00969 | 0,00005 | 0,00421<br>538 | yes |
| ENSDARG0000081029  | U5                  | 20:48781039-48781153 | low1C | ctl | OK | 184,39  | 833,857 | 2,17704 | 3,31457 | 0,00005 | 0,00421<br>538 | yes |
| ENSDARG0000099971  | 5S_rRNA             | KN150576.1:8255-8374 | low1C | ctl | OK | 1199,21 | 5292,74 | 2,14193 | 5,47411 | 0,00005 | 0,00421<br>538 | yes |
| ENSDARG0000070286  | si:ch211-113a14.19  | 25:35791636-35792023 | low1C | ctl | OK | 3,99176 | 17,4909 | 2,1315  | 3,45558 | 0,00005 | 0,00421<br>538 | yes |
| ENSDARG0000103491  | Metazoa_SR<br>P     | 11:11463567-11463864 | low1C | ctl | OK | 16,1807 | 70,7268 | 2,12799 | 4,21956 | 0,00005 | 0,00421<br>538 | yes |
| ENSDARG0000090149  | HIST4H4 (4<br>of 5) | 25:34540844-34541156 | low1C | ctl | OK | 4,44299 | 18,8394 | 2,08415 | 2,88508 | 0,00015 | 0,01096        | yes |
| ENSDARG0000080562  | U6atac              | 21:6287400-6287528   | low1C | ctl | OK | 200,252 | 839,673 | 2,06801 | 3,68353 | 0,00005 | 0,00421<br>538 | yes |
| ENSDARG0000090273  | Vault               | 14:2488593-2488721   | low1C | ctl | OK | 2159,99 | 9042,69 | 2,06572 | 3,88504 | 0,00005 | 0,00421<br>538 | yes |
| ENSDARG0000087236  | HIST1H4B            | 25:35812927-35813239 | low1C | ctl | OK | 5,41246 | 22,1767 | 2,03469 | 3,12266 | 0,00005 | 0,00421<br>538 | yes |
| ENSDARG0000080410  | U11                 | 19:16157463-16157599 | low1C | ctl | OK | 231,533 | 929,494 | 2,00523 | 4,0563  | 0,00005 | 0,00421<br>538 | yes |
| ENSDARG0000087732  | Metazoa_SR<br>P     | 3:30117896-30118194  | low1C | ctl | OK | 1035,43 | 4095,31 | 1,98374 | 7,20521 | 0,00005 | 0,00421<br>538 | yes |
| ENSDARG0000010276  | ptgs2b              | 20:34218938-34224536 | low1C | ctl | OK | 1,04185 | 4,01465 | 1,94612 | 4,44793 | 0,00005 | 0,00421<br>538 | yes |
| ENSDARG00000101840 | U3                  | 1:15765587-15765803  | low1C | ctl | OK | 654,764 | 2486,55 | 1,9251  | 6,78776 | 0,00005 | 0,00421<br>538 | yes |

|                    |                   |                      |       |     |    |         |         |         |         |         |            |     |
|--------------------|-------------------|----------------------|-------|-----|----|---------|---------|---------|---------|---------|------------|-----|
| ENSDARG0000090182  | si:dkey-261m9.18  | 25:34639275-34639662 | low1C | ctl | OK | 3,11268 | 11,7947 | 1,92191 | 2,84298 | 0,00005 | 0,00421538 | yes |
| ENSDARG00000101384 | Metazoa_SR P      | 11:11454269-11454566 | low1C | ctl | OK | 7,99724 | 29,9953 | 1,90716 | 3,08955 | 0,00005 | 0,00421538 | yes |
| ENSDARG0000084089  | Vault             | 15:21316458-21316550 | low1C | ctl | OK | 387,185 | 1450,22 | 1,90518 | 2,69702 | 0,0002  | 0,0139175  | yes |
| ENSDARG0000081270  | rn7sk             | 13:695612-695934     | low1C | ctl | OK | 436,011 | 1627,37 | 1,9001  | 7,13452 | 0,00005 | 0,00421538 | yes |
| ENSDARG0000087472  | HIST4H4 (2 of 5)  | 25:35776073-35776385 | low1C | ctl | OK | 12,3969 | 45,6364 | 1,88021 | 3,62679 | 0,00005 | 0,00421538 | yes |
| ENSDARG0000045230  | cox6b1            | 24:39718205-39722738 | low1C | ctl | OK | 14,6555 | 53,917  | 1,8793  | 5,61137 | 0,00005 | 0,00421538 | yes |
| ENSDARG00000100545 | Metazoa_SR P      | 11:12184380-12184677 | low1C | ctl | OK | 8,58364 | 31,0703 | 1,85588 | 3,02921 | 0,00005 | 0,00421538 | yes |
| ENSDARG0000082538  | U5                | 20:16528206-16528322 | low1C | ctl | OK | 108,448 | 390,588 | 1,84864 | 2,3808  | 0,0004  | 0,0243556  | yes |
| ENSDARG0000082628  | U1                | 10:211781-211947     | low1C | ctl | OK | 68,1832 | 243,43  | 1,83602 | 3,22143 | 0,00005 | 0,00421538 | yes |
| ENSDARG0000084628  | SNORA27           | 20:23182559-23182696 | low1C | ctl | OK | 175,713 | 620,119 | 1,81932 | 3,40924 | 0,00005 | 0,00421538 | yes |
| ENSDARG0000089044  | HIST4H4 (3 of 5)  | 25:35783062-35783374 | low1C | ctl | OK | 6,94645 | 24,3983 | 1,81243 | 2,9653  | 0,00005 | 0,00421538 | yes |
| ENSDARG0000080685  | SNORA50           | 3:55224901-55225036  | low1C | ctl | OK | 138,163 | 484,232 | 1,80932 | 3,05992 | 0,00005 | 0,00421538 | yes |
| ENSDARG0000099668  | snopsi28S-3327    | 19:16124093-16124240 | low1C | ctl | OK | 198,577 | 641,406 | 1,69154 | 3,45066 | 0,00005 | 0,00421538 | yes |
| ENSDARG0000087543  | si:dkey-108k21.12 | 25:34551646-34552140 | low1C | ctl | OK | 8,61012 | 27,2833 | 1,66392 | 2,69346 | 0,00005 | 0,00421538 | yes |
| ENSDARG0000089823  | si:ch211-113a14.6 | 25:35760530-35760842 | low1C | ctl | OK | 5,80862 | 17,9307 | 1,62617 | 2,46954 | 0,0004  | 0,0243556  | yes |

|                    |                        |                          |       |     |    |         |         |         |         |         |                |     |
|--------------------|------------------------|--------------------------|-------|-----|----|---------|---------|---------|---------|---------|----------------|-----|
| ENSDARG00000101500 | Metazoa_SR<br>P        | 11:12225287-<br>12225584 | low1C | ctl | OK | 17,0547 | 51,7144 | 1,6004  | 3,16945 | 0,00005 | 0,00421<br>538 | yes |
| ENSDARG00000081931 | SNORA16                | 19:16124945-<br>16125081 | low1C | ctl | OK | 1095,45 | 3311,51 | 1,59597 | 4,672   | 0,00005 | 0,00421<br>538 | yes |
| ENSDARG00000071082 | p4ha1b                 | 17:20127566-<br>20147370 | low1C | ctl | OK | 13,1177 | 39,5702 | 1,5929  | 6,06858 | 0,00005 | 0,00421<br>538 | yes |
| ENSDARG00000086604 | si:ch211-<br>113a14.25 | 25:35817417-<br>35817804 | low1C | ctl | OK | 4,97397 | 14,7158 | 1,5649  | 2,63452 | 0,00005 | 0,00421<br>538 | yes |
| ENSDARG00000093071 | zgc:110434             | 7:6226221-<br>6226608    | low1C | ctl | OK | 5,05388 | 14,8688 | 1,55682 | 2,60214 | 0,00005 | 0,00421<br>538 | yes |
| ENSDARG00000091205 | si:ch211-<br>113a14.19 | 7:73632521-<br>73632909  | low1C | ctl | OK | 3,09419 | 8,97424 | 1,53623 | 2,26509 | 0,0007  | 0,03824<br>05  | yes |
| ENSDARG00000099271 | 5_8S_rRNA              | KN149861.1:718<br>0-7336 | low1C | ctl | OK | 293,29  | 850,627 | 1,5362  | 3,47484 | 0,00005 | 0,00421<br>538 | yes |
| ENSDARG00000051775 | si:dkey-<br>108k21.15  | 25:34559683-<br>34560070 | low1C | ctl | OK | 10,0485 | 28,7906 | 1,51862 | 3,0866  | 0,00005 | 0,00421<br>538 | yes |
| ENSDARG00000085485 | SNORA26                | 20:23182968-<br>23183090 | low1C | ctl | OK | 306,641 | 875,31  | 1,51324 | 2,8596  | 0,00005 | 0,00421<br>538 | yes |
| ENSDARG00000070265 | si:dkey-<br>261m9.7    | 25:34628445-<br>34628832 | low1C | ctl | OK | 10,4697 | 29,6372 | 1,50118 | 3,11221 | 0,00005 | 0,00421<br>538 | yes |
| ENSDARG00000086552 | zgc:154164             | 7:6231967-<br>6232548    | low1C | ctl | OK | 12,4671 | 34,9665 | 1,48785 | 3,24355 | 0,00005 | 0,00421<br>538 | yes |
| ENSDARG00000090591 | si:dkey-<br>261m9.13   | 25:34638090-<br>34638402 | low1C | ctl | OK | 11,9338 | 33,3894 | 1,48434 | 2,78264 | 0,00005 | 0,00421<br>538 | yes |
| ENSDARG00000101249 | HIST1H4J (2<br>of 2)   | 7:5837576-<br>5838171    | low1C | ctl | OK | 2,36026 | 6,50212 | 1,46197 | 2,42055 | 0,0003  | 0,01934<br>12  | yes |
| ENSDARG00000104706 | U3                     | 7:7545593-<br>7545807    | low1C | ctl | OK | 590,628 | 1624,18 | 1,45939 | 3,86776 | 0,00005 | 0,00421<br>538 | yes |
| ENSDARG00000075379 | si:dkey-<br>261m9.11   | 25:34635401-<br>34635788 | low1C | ctl | OK | 7,46727 | 20,1941 | 1,43528 | 2,72679 | 0,00005 | 0,00421<br>538 | yes |

|                    |                    |                      |       |     |    |         |         |         |         |         |            |     |
|--------------------|--------------------|----------------------|-------|-----|----|---------|---------|---------|---------|---------|------------|-----|
| ENSDARG00000102435 | plekhf1            | 7:45703170-45704590  | low1C | ctl | OK | 3,19026 | 8,61876 | 1,43381 | 3,40587 | 0,00005 | 0,00421538 | yes |
| ENSDARG00000089719 | si:dkey-108k21.11  | 25:34549261-34549710 | low1C | ctl | OK | 10,6629 | 28,6823 | 1,42757 | 3,23291 | 0,00005 | 0,00421538 | yes |
| ENSDARG00000097103 | zgc:165555         | 25:34560843-34561155 | low1C | ctl | OK | 9,00982 | 23,993  | 1,41304 | 2,40268 | 0,0003  | 0,0193412  | yes |
| ENSDARG00000095340 | si:ch73-36p18.2    | 25:35762739-35763150 | low1C | ctl | OK | 8,3795  | 22,2038 | 1,40587 | 2,83483 | 0,00005 | 0,00421538 | yes |
| ENSDARG00000051732 | si:ch211-113a14.7  | 25:35761613-35762000 | low1C | ctl | OK | 7,49166 | 19,8218 | 1,40373 | 2,6321  | 0,00005 | 0,00421538 | yes |
| ENSDARG00000099123 | zgc:110434         | 7:5835310-5835953    | low1C | ctl | OK | 5,70632 | 15,0619 | 1,40027 | 3,1118  | 0,00005 | 0,00421538 | yes |
| ENSDARG00000105169 | SCARNA14           | 15:43993989-43994120 | low1C | ctl | OK | 184,368 | 476,807 | 1,37082 | 2,34731 | 0,00015 | 0,01096    | yes |
| ENSDARG00000100279 | CU457819.2         | 7:6218466-6219610    | low1C | ctl | OK | 9,53139 | 24,6039 | 1,36813 | 2,71732 | 0,00005 | 0,00421538 | yes |
| ENSDARG00000075220 | si:ch211-113a14.19 | 7:73600357-73600745  | low1C | ctl | OK | 12,224  | 31,0342 | 1,34414 | 2,89384 | 0,00005 | 0,00421538 | yes |
| ENSDARG00000102172 | si:ch73-36p18.2    | 7:6231080-6231491    | low1C | ctl | OK | 7,79783 | 19,7418 | 1,34011 | 2,59993 | 0,00005 | 0,00421538 | yes |
| ENSDARG00000102011 | Metazoa_SR P       | 11:12179130-12179427 | low1C | ctl | OK | 25,4629 | 64,428  | 1,33929 | 2,95085 | 0,00005 | 0,00421538 | yes |
| ENSDARG00000097020 | si:dkey-261m9.8    | 25:34629434-34629845 | low1C | ctl | OK | 11,1079 | 27,7675 | 1,32181 | 2,89169 | 0,00005 | 0,00421538 | yes |
| ENSDARG00000068928 | si:dkey-108k21.26  | 25:34605350-34605737 | low1C | ctl | OK | 9,01278 | 22,5166 | 1,32095 | 2,60838 | 0,00005 | 0,00421538 | yes |
| ENSDARG00000104115 | 5_8S_rRNA          | 1:3784199-3784354    | low1C | ctl | OK | 156,251 | 388,287 | 1,31326 | 2,55504 | 0,00005 | 0,00421538 | yes |
| ENSDARG00000070287 | zgc:173552         | 25:35799854-35800265 | low1C | ctl | OK | 5,66969 | 14,0824 | 1,31256 | 2,34509 | 0,00025 | 0,0166061  | yes |

|                        |                        |                          |       |     |    |              |         |         |         |         |                |     |
|------------------------|------------------------|--------------------------|-------|-----|----|--------------|---------|---------|---------|---------|----------------|-----|
| ENSDARG00000<br>015543 | s100a1                 | 16:29450941-<br>29452592 | low1C | ctl | OK | 1,87139      | 4,63992 | 1,30999 | 2,11546 | 0,001   | 0,04817<br>58  | yes |
| ENSDARG00000<br>082850 | U8                     | 10:22877819-<br>22877952 | low1C | ctl | OK | 201,231      | 491,11  | 1,28719 | 2,27151 | 0,0004  | 0,02435<br>56  | yes |
| ENSDARG00000<br>041294 | noxo1a                 | 3:61924549-<br>61931972  | low1C | ctl | OK | 4,66896      | 11,3638 | 1,28327 | 4,20379 | 0,00005 | 0,00421<br>538 | yes |
| ENSDARG00000<br>071596 | neto1l                 | 24:15753297-<br>15992150 | low1C | ctl | OK | 0,45229<br>4 | 1,09487 | 1,27543 | 2,43585 | 0,00005 | 0,00421<br>538 | yes |
| ENSDARG00000<br>074260 | si:ch211-<br>113a14.25 | 7:73623443-<br>73623831  | low1C | ctl | OK | 14,8161      | 35,6856 | 1,26818 | 2,8869  | 0,00005 | 0,00421<br>538 | yes |
| ENSDARG00000<br>102946 | si:ch73-<br>167f10.1   | 3:45233846-<br>45237689  | low1C | ctl | OK | 5,67751      | 13,659  | 1,26652 | 2,20896 | 0,00045 | 0,02702<br>47  | yes |
| ENSDARG00000<br>051734 | si:ch211-<br>113a14.16 | 25:35787200-<br>35787587 | low1C | ctl | OK | 9,49585      | 22,8395 | 1,26616 | 2,52214 | 0,00005 | 0,00421<br>538 | yes |
| ENSDARG00000<br>056108 | ndufa4                 | 12:9842649-<br>9846483   | low1C | ctl | OK | 6,74401      | 16,1869 | 1,26314 | 3,89467 | 0,00005 | 0,00421<br>538 | yes |
| ENSDARG00000<br>075730 | dnph1                  | 13:4089832-<br>4095459   | low1C | ctl | OK | 4,88463      | 11,6568 | 1,25485 | 2,71079 | 0,00005 | 0,00421<br>538 | yes |
| ENSDARG00000<br>051736 | zgc:114037             | 25:35778804-<br>35779286 | low1C | ctl | OK | 5,91732      | 13,9568 | 1,23795 | 2,43127 | 0,00015 | 0,01096        | yes |
| ENSDARG00000<br>078941 | wu:fe11b02             | 25:34650659-<br>34677389 | low1C | ctl | OK | 6,00583      | 14,1558 | 1,23696 | 3,47238 | 0,00005 | 0,00421<br>538 | yes |
| ENSDARG00000<br>091382 | HIST4H4 (5<br>of 5)    | 7:6221820-<br>6222132    | low1C | ctl | OK | 17,0723      | 40,2245 | 1,23642 | 2,52053 | 0,00005 | 0,00421<br>538 | yes |
| ENSDARG00000<br>100906 | zgc:195633             | 7:5853546-<br>5854332    | low1C | ctl | OK | 3,07081      | 7,19945 | 1,22927 | 2,46861 | 0,0001  | 0,00772<br>511 | yes |
| ENSDARG00000<br>087670 | si:dkey-<br>108k21.28  | 25:34608621-<br>34608933 | low1C | ctl | OK | 13,9269      | 32,3592 | 1,2163  | 2,34071 | 0,0001  | 0,00772<br>511 | yes |
| ENSDARG00000<br>103819 | si:ch73-<br>36p18.2    | 7:5783461-<br>5784061    | low1C | ctl | OK | 10,1737      | 23,2683 | 1,19352 | 2,97755 | 0,00005 | 0,00421<br>538 | yes |



|                    |                   |                        |       |     |    |          |         |         |         |         |            |     |
|--------------------|-------------------|------------------------|-------|-----|----|----------|---------|---------|---------|---------|------------|-----|
| ENSDARG00000102700 | FP236157.1        | 1:58794190-58798723    | low1C | ctl | OK | 0,43555  | 0,98792 | 1,18156 | 2,43052 | 0,0002  | 0,0139175  | yes |
| ENSDARG00000069135 | ppp1r15a          | 7:71262904-71268268    | low1C | ctl | OK | 12,3907  | 28,0017 | 1,17625 | 4,00474 | 0,00005 | 0,00421538 | yes |
| ENSDARG00000100903 | Y_RNA             | KN150170.1:35263-35370 | low1C | ctl | OK | 4224,59  | 9540,46 | 1,17525 | 3,59183 | 0,00005 | 0,00421538 | yes |
| ENSDARG00000100210 | wu:fe11b02        | 7:6220676-6221051      | low1C | ctl | OK | 22,0309  | 49,6546 | 1,1724  | 2,88849 | 0,00005 | 0,00421538 | yes |
| ENSDARG00000096596 | zgc:173552        | 25:35815847-35816258   | low1C | ctl | OK | 12,1467  | 27,3093 | 1,16883 | 2,57981 | 0,0001  | 0,00772511 | yes |
| ENSDARG00000099920 | si:ch211-113a14.6 | 7:5846577-5847340      | low1C | ctl | OK | 3,00732  | 6,7602  | 1,16859 | 2,26715 | 0,0001  | 0,00772511 | yes |
| ENSDARG00000099351 | igfbp1a           | 20:6818826-6822741     | low1C | ctl | OK | 7,33405  | 16,0646 | 1,1312  | 2,9172  | 0,00005 | 0,00421538 | yes |
| ENSDARG00000055046 | ponzr5            | 7:22386408-22392814    | low1C | ctl | OK | 5,5808   | 12,0298 | 1,10806 | 2,56128 | 0,00005 | 0,00421538 | yes |
| ENSDARG00000051737 | zgc:173552        | 25:35779903-35780314   | low1C | ctl | OK | 11,3391  | 24,2182 | 1,09478 | 2,3364  | 0,0001  | 0,00772511 | yes |
| ENSDARG00000012987 | gpia              | 25:35408674-35434057   | low1C | ctl | OK | 14,9885  | 31,8565 | 1,08773 | 3,15768 | 0,00005 | 0,00421538 | yes |
| ENSDARG00000042492 | si:dkey-250d21.1  | 10:32122494-32128929   | low1C | ctl | OK | 0,591321 | 1,25515 | 1,08584 | 1,95031 | 0,0009  | 0,0447093  | yes |
| ENSDARG00000091446 | HIST2H4A          | 25:34642428-34642740   | low1C | ctl | OK | 13,7404  | 29,1205 | 1,08361 | 2,05872 | 0,0007  | 0,0382405  | yes |
| ENSDARG00000083480 | AC024175.23       | MT:950-1019            | low1C | ctl | OK | 4803,59  | 10173,8 | 1,08267 | 1,98398 | 0,00085 | 0,0434566  | yes |
| ENSDARG00000086304 | si:ch73-36p18.5   | 25:34622272-34622659   | low1C | ctl | OK | 12,8681  | 27,2514 | 1,08254 | 2,31597 | 0,00005 | 0,00421538 | yes |
| ENSDARG00000021343 | wsb1              | 15:31281041-31296583   | low1C | ctl | OK | 24,0955  | 50,5673 | 1,06944 | 3,22542 | 0,00005 | 0,00421538 | yes |

|                   |                    |                      |       |     |    |         |         |          |         |         |            |     |
|-------------------|--------------------|----------------------|-------|-----|----|---------|---------|----------|---------|---------|------------|-----|
| ENSDARG0000058508 | CFAP70             | 3:12036960-12087556  | low1C | ctl | OK | 1,46114 | 3,05588 | 1,06449  | 2,70582 | 0,00005 | 0,00421538 | yes |
| ENSDARG0000086555 | HIST4H4 (1 of 5)   | 7:73634439-73634751  | low1C | ctl | OK | 18,5025 | 38,4772 | 1,05628  | 2,19787 | 0,0002  | 0,0139175  | yes |
| ENSDARG0000098875 | Metazoa_SR P       | 11:12203684-12203981 | low1C | ctl | OK | 42,6125 | 88,6035 | 1,05609  | 2,62582 | 0,00005 | 0,00421538 | yes |
| ENSDARG0000082753 | AC024175.17        | MT:1019-1971         | low1C | ctl | OK | 1723,8  | 3583,48 | 1,05577  | 3,87819 | 0,00005 | 0,00421538 | yes |
| ENSDARG0000074937 | si:dkey-261m9.15   | 25:34646882-34647269 | low1C | ctl | OK | 9,6133  | 19,9572 | 1,0538   | 2,08189 | 0,0006  | 0,0340505  | yes |
| ENSDARG0000058206 | si:ch211-153b23.5  | 14:11151485-11154988 | low1C | ctl | OK | 14,5258 | 29,4497 | 1,01963  | 3,17676 | 0,00005 | 0,00421538 | yes |
| ENSDARG0000031915 | hif1an             | 13:29822182-29849765 | low1C | ctl | OK | 13,1071 | 26,5358 | 1,0176   | 2,44416 | 0,00005 | 0,00421538 | yes |
| ENSDARG0000093195 | si:dkey-261m9.6    | 25:34627131-34627506 | low1C | ctl | OK | 45,3926 | 91,455  | 1,0106   | 2,97502 | 0,00005 | 0,00421538 | yes |
| ENSDARG0000097258 | si:dkey-108k21.25  | 25:34604167-34604578 | low1C | ctl | OK | 9,22917 | 18,4708 | 1,00097  | 1,99526 | 0,001   | 0,0481758  | yes |
| ENSDARG0000092395 | si:ch73-36p18.1    | 25:34616373-34616988 | low1C | ctl | OK | 8,94523 | 17,8513 | 0,996836 | 2,42614 | 0,00005 | 0,00421538 | yes |
| ENSDARG0000104944 | HIST2H3A (2 of 2)  | 25:34615322-34615733 | low1C | ctl | OK | 11,0479 | 21,6484 | 0,970484 | 2,0692  | 0,00065 | 0,0365333  | yes |
| ENSDARG0000091770 | zgc:173552         | 7:73594850-73595261  | low1C | ctl | OK | 20,663  | 40,3906 | 0,966969 | 2,48827 | 0,00005 | 0,00421538 | yes |
| ENSDARG0000039547 | si:ch211-113a14.22 | 25:35797406-35797781 | low1C | ctl | OK | 40,8671 | 79,8683 | 0,966681 | 2,80739 | 0,00005 | 0,00421538 | yes |
| ENSDARG0000097785 | si:ch73-36p18.2    | 25:34634151-34634562 | low1C | ctl | OK | 18,5287 | 36,1953 | 0,966045 | 2,39505 | 0,00005 | 0,00421538 | yes |
| ENSDARG0000076930 | HIST1H4F           | 25:34632121-34632433 | low1C | ctl | OK | 29,0031 | 56,1435 | 0,952913 | 2,22389 | 0,0002  | 0,0139175  | yes |

|                        |                       |                          |       |     |    |         |         |          |         |         |                |     |
|------------------------|-----------------------|--------------------------|-------|-----|----|---------|---------|----------|---------|---------|----------------|-----|
| ENSDARG00000<br>060113 | znf395a               | 17:16082226-<br>16100451 | low1C | ctl | OK | 34,2009 | 66,1609 | 0,951946 | 3,45632 | 0,00005 | 0,00421<br>538 | yes |
| ENSDARG00000<br>070280 | zgc:173652            | 25:35798681-<br>35799293 | low1C | ctl | OK | 7,67183 | 14,6643 | 0,93466  | 2,13521 | 0,00025 | 0,01660<br>61  | yes |
| ENSDARG00000<br>042210 | sema3ab               | 18:9354097-<br>9470930   | low1C | ctl | OK | 1,04988 | 1,99696 | 0,927575 | 2,076   | 0,0007  | 0,03824<br>05  | yes |
| ENSDARG00000<br>031929 | stard14               | 14:32930072-<br>32937770 | low1C | ctl | OK | 4,89689 | 9,21726 | 0,912473 | 2,83159 | 0,00005 | 0,00421<br>538 | yes |
| ENSDARG00000<br>090893 | HIST1H4C              | 7:5787632-<br>5787944    | low1C | ctl | OK | 23,3181 | 43,7821 | 0,908892 | 1,96363 | 0,0008  | 0,04187<br>7   | yes |
| ENSDARG00000<br>019702 | aldocb                | 21:39585911-<br>39616539 | low1C | ctl | OK | 12,8786 | 24,1272 | 0,90568  | 3,45852 | 0,00005 | 0,00421<br>538 | yes |
| ENSDARG00000<br>076839 | ftr86                 | 15:545649-<br>555950     | low1C | ctl | OK | 5,15235 | 9,5572  | 0,891358 | 2,79072 | 0,00005 | 0,00421<br>538 | yes |
| ENSDARG00000<br>076129 | si:ch73-<br>36p18.3   | 25:34619243-<br>34619618 | low1C | ctl | OK | 32,7915 | 60,5953 | 0,885884 | 2,36776 | 0,00005 | 0,00421<br>538 | yes |
| ENSDARG00000<br>100697 | si:ch73-<br>52f24.4   | 16:51328511-<br>51349886 | low1C | ctl | OK | 36,5084 | 67,3748 | 0,883981 | 3,17678 | 0,00005 | 0,00421<br>538 | yes |
| ENSDARG00000<br>053087 | mthfr                 | 8:47228640-<br>47262086  | low1C | ctl | OK | 3,9068  | 7,1398  | 0,869896 | 2,53705 | 0,00005 | 0,00421<br>538 | yes |
| ENSDARG00000<br>035852 | CU469544.1            | 7:52691499-<br>52692399  | low1C | ctl | OK | 8,14674 | 14,8332 | 0,864536 | 2,13    | 0,0005  | 0,02922<br>67  | yes |
| ENSDARG00000<br>093494 | si:ch211-<br>217k17.9 | 1:51757706-<br>51765926  | low1C | ctl | OK | 14,3483 | 25,9265 | 0,853545 | 2,66141 | 0,00005 | 0,00421<br>538 | yes |
| ENSDARG00000<br>070617 | vhl                   | 6:40442385-<br>40457573  | low1C | ctl | OK | 4,58671 | 8,21388 | 0,840603 | 2,00688 | 0,00075 | 0,03997<br>57  | yes |
| ENSDARG00000<br>051770 | si:dkey-<br>108k21.19 | 25:34542495-<br>34542882 | low1C | ctl | OK | 19,4709 | 34,8262 | 0,838859 | 1,98769 | 0,00035 | 0,02184<br>2   | yes |
| ENSDARG00000<br>037618 | ddit4                 | 12:48356810-<br>48358937 | low1C | ctl | OK | 55,125  | 98,2744 | 0,83411  | 3,01043 | 0,00005 | 0,00421<br>538 | yes |

|                        |                       |                           |       |     |    |         |         |          |         |         |                |     |
|------------------------|-----------------------|---------------------------|-------|-----|----|---------|---------|----------|---------|---------|----------------|-----|
| ENSDARG00000<br>036965 | rnf24                 | 1:41066428-<br>41116690   | low1C | ctl | OK | 3,30593 | 5,8818  | 0,831202 | 2,46664 | 0,00005 | 0,00421<br>538 | yes |
| ENSDARG00000<br>013335 | anxa6                 | 14:50263573-<br>50372929  | low1C | ctl | OK | 16,8196 | 29,6845 | 0,819567 | 2,59902 | 0,00005 | 0,00421<br>538 | yes |
| ENSDARG00000<br>103147 | wu:fe11b02            | 7:6227972-<br>6228347     | low1C | ctl | OK | 29,6182 | 51,5553 | 0,799636 | 2,09511 | 0,00035 | 0,02184<br>2   | yes |
| ENSDARG00000<br>060962 | btr04                 | 7:15924704-<br>15943187   | low1C | ctl | OK | 5,3829  | 9,28738 | 0,786888 | 1,94978 | 0,00085 | 0,04345<br>66  | yes |
| ENSDARG00000<br>103162 | CABZ01046<br>954.1    | 25:32784668-<br>32790239  | low1C | ctl | OK | 3,80662 | 6,49972 | 0,771866 | 1,95741 | 0,00075 | 0,03997<br>57  | yes |
| ENSDARG00000<br>074667 | akt1s1                | 3:30059576-<br>30069715   | low1C | ctl | OK | 40,3324 | 68,5166 | 0,764515 | 3,22962 | 0,00005 | 0,00421<br>538 | yes |
| ENSDARG00000<br>012499 | per1b                 | 7:50547394-<br>50571221   | low1C | ctl | OK | 2,26439 | 3,77689 | 0,738078 | 2,53501 | 0,00005 | 0,00421<br>538 | yes |
| ENSDARG00000<br>071345 | mgst2                 | 14:47229403-<br>47232807  | low1C | ctl | OK | 19,6339 | 32,3769 | 0,721617 | 2,36787 | 0,0001  | 0,00772<br>511 | yes |
| ENSDARG00000<br>004748 | zgc:100868            | 3:39331321-<br>39346662   | low1C | ctl | OK | 8,64695 | 14,2052 | 0,716159 | 2,66711 | 0,00005 | 0,00421<br>538 | yes |
| ENSDARG00000<br>089039 | zgc:173585            | 25:34630717-<br>34631309  | low1C | ctl | OK | 38,0346 | 62,2254 | 0,710193 | 2,38365 | 0,00005 | 0,00421<br>538 | yes |
| ENSDARG00000<br>102806 | zgc:171759            | 7:5839127-<br>5839856     | low1C | ctl | OK | 12,0105 | 19,3469 | 0,687805 | 1,90164 | 0,00095 | 0,04640<br>45  | yes |
| ENSDARG00000<br>051778 | zgc:194989            | 25:34601338-<br>34601825  | low1C | ctl | OK | 30,4689 | 48,5331 | 0,671629 | 1,98471 | 0,00035 | 0,02184<br>2   | yes |
| ENSDARG00000<br>077587 | si:dkey-<br>108k21.24 | 25:34645564-<br>34645975  | low1C | ctl | OK | 43,0435 | 68,4009 | 0,668219 | 2,01255 | 0,0007  | 0,03824<br>05  | yes |
| ENSDARG00000<br>034203 | si:dkey-<br>108k21.9  | 25:34543986-<br>34544363  | low1C | ctl | OK | 63,5599 | 100,52  | 0,661299 | 2,06462 | 0,0004  | 0,02435<br>56  | yes |
| ENSDARG00000<br>100783 | PRTG (2 of<br>2)      | KN150056.1:401<br>7-28432 | low1C | ctl | OK | 7,65722 | 12,0677 | 0,656261 | 2,11916 | 0,00045 | 0,02702<br>47  | yes |

|                    |                    |                      |       |     |    |         |         |           |          |         |            |     |
|--------------------|--------------------|----------------------|-------|-----|----|---------|---------|-----------|----------|---------|------------|-----|
| ENSDARG00000101251 | ldha               | 25:25028200-25099874 | low1C | ctl | OK | 22,268  | 34,963  | 0,650857  | 1,97725  | 0,0008  | 0,041877   | yes |
| ENSDARG0000008363  | mcl1b              | 16:29651325-29656830 | low1C | ctl | OK | 31,9045 | 49,9816 | 0,647636  | 2,20464  | 0,0001  | 0,00772511 | yes |
| ENSDARG0000040284  | si:dkey-79d12.5    | 16:24904085-24917006 | low1C | ctl | OK | 3,21517 | 5,01694 | 0,641914  | 2,03937  | 0,00035 | 0,021842   | yes |
| ENSDARG00000100185 | elovl7b            | KN150589.1:3099-5397 | low1C | ctl | OK | 12,5689 | 19,3368 | 0,62149   | 2,11024  | 0,0004  | 0,0243556  | yes |
| ENSDARG00000094744 | si:ch211-113a14.15 | 25:35784227-35784648 | low1C | ctl | OK | 52,3859 | 80,5664 | 0,621001  | 1,97256  | 0,0005  | 0,0292267  | yes |
| ENSDARG00000030905 | cited2             | 20:37012263-37014791 | low1C | ctl | OK | 11,7017 | 17,5106 | 0,581508  | 2,12795  | 0,00025 | 0,0166061  | yes |
| ENSDARG00000010085 | p4ha2              | 21:43102683-43136621 | low1C | ctl | OK | 19,9216 | 29,4239 | 0,562657  | 2,07897  | 0,00025 | 0,0166061  | yes |
| ENSDARG00000015822 | sesn3              | 15:35185037-35234766 | low1C | ctl | OK | 8,83073 | 12,9404 | 0,551275  | 2,11481  | 0,0002  | 0,0139175  | yes |
| ENSDARG00000022456 | eno1a              | 23:22729925-22751447 | low1C | ctl | OK | 58,8905 | 85,2504 | 0,533671  | 1,91561  | 0,00055 | 0,0317263  | yes |
| ENSDARG00000011665 | aldoaa             | 3:39425140-39435194  | low1C | ctl | OK | 345,1   | 490,856 | 0,508285  | 2,12866  | 0,00035 | 0,021842   | yes |
| ENSDARG00000043973 | znf292b            | 20:207905-223285     | low1C | ctl | OK | 7,06148 | 9,85044 | 0,480218  | 1,97757  | 0,00035 | 0,021842   | yes |
| ENSDARG00000102808 | calr3b             | 2:55660711-55673493  | low1C | ctl | OK | 82,6522 | 61,1771 | -0,434062 | -1,8691  | 0,00085 | 0,0434566  | yes |
| ENSDARG00000044914 | suc1g2             | 11:16603543-16840555 | low1C | ctl | OK | 43,2517 | 31,3492 | -0,464331 | -1,94779 | 0,00095 | 0,0464045  | yes |
| ENSDARG00000001014 | myh9b              | 3:5177801-5318329    | low1C | ctl | OK | 73,373  | 53,0529 | -0,467817 | -2,01202 | 0,00035 | 0,021842   | yes |
| ENSDARG00000101816 | col5a3b            | 1:58545606-58581062  | low1C | ctl | OK | 26,7759 | 19,3437 | -0,469075 | -1,94513 | 0,00085 | 0,0434566  | yes |

|                    |           |                      |       |     |    |         |         |           |          |         |            |     |
|--------------------|-----------|----------------------|-------|-----|----|---------|---------|-----------|----------|---------|------------|-----|
| ENSDARG0000008697  | epas1a    | 12:25684398-25738189 | low1C | ctl | OK | 11,6985 | 8,41662 | -0,475013 | -1,95049 | 0,0006  | 0,0340505  | yes |
| ENSDARG0000042780  | apoba     | 17:30687104-30711003 | low1C | ctl | OK | 22,0712 | 15,8232 | -0,480121 | -2,05623 | 0,0003  | 0,0193412  | yes |
| ENSDARG0000059227  | fabp1b.1  | 8:933677-940431      | low1C | ctl | OK | 1676,01 | 1195,29 | -0,487671 | -2,09021 | 0,0002  | 0,0139175  | yes |
| ENSDARG0000062054  | cpt1ab    | 25:23494441-23546729 | low1C | ctl | OK | 13,3451 | 9,44604 | -0,498528 | -1,93038 | 0,0007  | 0,0382405  | yes |
| ENSDARG0000098584  | ndufa13   | KN149883.1:2234-5251 | low1C | ctl | OK | 406,434 | 286,885 | -0,502549 | -1,93905 | 0,00055 | 0,0317263  | yes |
| ENSDARG0000012002  | slc38a7   | 7:51520670-51539701  | low1C | ctl | OK | 19,261  | 13,5553 | -0,506828 | -1,97617 | 0,0006  | 0,0340505  | yes |
| ENSDARG0000074656  | ctssb.1   | 16:29574509-29578811 | low1C | ctl | OK | 112,247 | 78,8843 | -0,508866 | -2,11685 | 0,0002  | 0,0139175  | yes |
| ENSDARG00000101334 | ctsc      | 15:43682885-43704485 | low1C | ctl | OK | 80,0405 | 55,5588 | -0,526714 | -2,25314 | 0,0001  | 0,00772511 | yes |
| ENSDARG0000076838  | apom      | 2:42379322-42385143  | low1C | ctl | OK | 85,5814 | 59,3823 | -0,527263 | -2,05363 | 0,00085 | 0,0434566  | yes |
| ENSDARG0000036848  | slc43a2a  | 15:28435946-28475836 | low1C | ctl | OK | 28,9225 | 20,0518 | -0,528458 | -2,12587 | 0,00015 | 0,01096    | yes |
| ENSDARG0000008637  | mtp       | 1:11419100-11439741  | low1C | ctl | OK | 25,5488 | 17,6996 | -0,52954  | -1,90501 | 0,00095 | 0,0464045  | yes |
| ENSDARG0000090850  | serpina1l | 20:10550784-10553957 | low1C | ctl | OK | 46,0278 | 31,8004 | -0,53346  | -2,14716 | 0,00035 | 0,021842   | yes |
| ENSDARG0000093549  | sepp1a    | 8:31426219-31434102  | low1C | ctl | OK | 161,647 | 111,37  | -0,537488 | -2,1831  | 0,00005 | 0,00421538 | yes |
| ENSDARG00000103271 | pla2g15   | 25:13592659-13607426 | low1C | ctl | OK | 27,1849 | 18,6817 | -0,541183 | -2,1619  | 0,0003  | 0,0193412  | yes |
| ENSDARG0000099301  | CDC37     | KN149781.1:4958-8644 | low1C | ctl | OK | 310,37  | 213,253 | -0,541425 | -2,33776 | 0,0002  | 0,0139175  | yes |

|                    |           |                      |       |     |    |         |         |           |          |         |            |     |
|--------------------|-----------|----------------------|-------|-----|----|---------|---------|-----------|----------|---------|------------|-----|
| ENSDARG0000045516  | itih2     | 4:25192373-25226770  | low1C | ctl | OK | 25,4969 | 17,4664 | -0,545736 | -1,98864 | 0,0007  | 0,0382405  | yes |
| ENSDARG0000036893  | f13a1b    | 7:8024804-8098285    | low1C | ctl | OK | 15,9014 | 10,839  | -0,55292  | -2,06521 | 0,0003  | 0,0193412  | yes |
| ENSDARG0000061383  | serpinf2b | 15:26608142-26619776 | low1C | ctl | OK | 13,9499 | 9,49966 | -0,554306 | -1,8815  | 0,001   | 0,0481758  | yes |
| ENSDARG0000036074  | cebpa     | 7:37813727-37816607  | low1C | ctl | OK | 17,4648 | 11,8888 | -0,554841 | -2,14541 | 0,00035 | 0,021842   | yes |
| ENSDARG0000056640  | rpia      | 13:13799270-13813296 | low1C | ctl | OK | 69,7565 | 47,4777 | -0,555078 | -1,87262 | 0,0008  | 0,041877   | yes |
| ENSDARG0000088439  | gm2a      | 14:25927109-25930546 | low1C | ctl | OK | 37,2425 | 25,2348 | -0,561534 | -2,05785 | 0,0002  | 0,0139175  | yes |
| ENSDARG0000016745  | slc35f6   | 20:26005108-26011553 | low1C | ctl | OK | 42,4158 | 28,6491 | -0,566113 | -2,33874 | 0,00005 | 0,00421538 | yes |
| ENSDARG0000003570  | hsp90b1   | 4:9835548-9842920    | low1C | ctl | OK | 48,5198 | 32,719  | -0,568446 | -2,37214 | 0,00005 | 0,00421538 | yes |
| ENSDARG0000018529  | lipf      | 12:17036767-17079154 | low1C | ctl | OK | 14,9567 | 10,0834 | -0,568813 | -1,96969 | 0,00075 | 0,0399757  | yes |
| ENSDARG00000101239 | hsd17b4   | 8:190534-214498      | low1C | ctl | OK | 8,60588 | 5,78275 | -0,573569 | -1,95663 | 0,0009  | 0,0447093  | yes |
| ENSDARG0000090912  | npc2      | 17:43031044-43041345 | low1C | ctl | OK | 312,112 | 209,711 | -0,573663 | -2,47342 | 0,00005 | 0,00421538 | yes |
| ENSDARG0000098645  | rgn       | 6:8895449-8904447    | low1C | ctl | OK | 14,088  | 9,39852 | -0,583962 | -1,91649 | 0,0009  | 0,0447093  | yes |
| ENSDARG0000039459  | qsox1     | 8:14465904-14517080  | low1C | ctl | OK | 8,2131  | 5,46312 | -0,588201 | -1,98653 | 0,0005  | 0,0292267  | yes |
| ENSDARG0000042010  | PKLR      | 16:54629440-54634651 | low1C | ctl | OK | 18,2168 | 12,1114 | -0,588904 | -2,04895 | 0,00045 | 0,0270247  | yes |
| ENSDARG0000037307  | gnpda1    | 14:23411966-23416458 | low1C | ctl | OK | 24,9583 | 16,5034 | -0,596758 | -2,01853 | 0,00055 | 0,0317263  | yes |

|                    |                 |                      |       |     |    |         |         |           |          |         |            |     |
|--------------------|-----------------|----------------------|-------|-----|----|---------|---------|-----------|----------|---------|------------|-----|
| ENSDARG0000032976  | cmic1           | 5:63486420-63487216  | low1C | ctl | OK | 57,5792 | 37,9796 | -0,600323 | -2,20435 | 0,0002  | 0,0139175  | yes |
| ENSDARG0000012729  | hcls1           | 4:22579351-22590686  | low1C | ctl | OK | 5,77728 | 3,80711 | -0,601696 | -1,83482 | 0,001   | 0,0481758  | yes |
| ENSDARG00000105142 | tcirg1b         | 14:16471654-16504836 | low1C | ctl | OK | 14,1276 | 9,29065 | -0,60467  | -2,29354 | 0,00005 | 0,00421538 | yes |
| ENSDARG0000023082  | krt1-19d        | 19:5408166-5416298   | low1C | ctl | OK | 26,3392 | 17,3202 | -0,604763 | -2,15658 | 0,0004  | 0,0243556  | yes |
| ENSDARG0000003931  | cndp2           | 19:21216736-21238776 | low1C | ctl | OK | 12,6578 | 8,32284 | -0,604883 | -2,08788 | 0,0003  | 0,0193412  | yes |
| ENSDARG0000075016  | apobb.2         | 20:53634247-53664835 | low1C | ctl | OK | 8,37931 | 5,5062  | -0,605774 | -2,43677 | 0,00005 | 0,00421538 | yes |
| ENSDARG00000100589 | ZNF830          | KN150544.1:0-282     | low1C | ctl | OK | 227,396 | 149,338 | -0,606623 | -2,00609 | 0,00025 | 0,0166061  | yes |
| ENSDARG00000103347 | cyp2aa3         | 23:42516640-42528380 | low1C | ctl | OK | 23,4633 | 15,3815 | -0,60921  | -2,23865 | 0,00015 | 0,01096    | yes |
| ENSDARG0000063518  | CPN2            | 2:50629-53978        | low1C | ctl | OK | 15,1543 | 9,91989 | -0,611336 | -2,21577 | 0,00015 | 0,01096    | yes |
| ENSDARG0000090286  | serpina1        | 20:10556859-10560171 | low1C | ctl | OK | 89,4232 | 57,8653 | -0,62795  | -2,45919 | 0,00005 | 0,00421538 | yes |
| ENSDARG0000099389  | cdo1            | KN149707.1:3860-5958 | low1C | ctl | OK | 152,655 | 98,7188 | -0,628881 | -2,47779 | 0,00005 | 0,00421538 | yes |
| ENSDARG0000053973  | fetub           | 22:37934446-37944777 | low1C | ctl | OK | 970,509 | 627,092 | -0,630064 | -2,49604 | 0,00005 | 0,00421538 | yes |
| ENSDARG0000099200  | zgc:123103      | 19:42978261-42981901 | low1C | ctl | OK | 59,2257 | 37,9883 | -0,640666 | -2,52319 | 0,00005 | 0,00421538 | yes |
| ENSDARG0000042684  | serpinc1        | 22:15995940-16001921 | low1C | ctl | OK | 33,3716 | 21,2769 | -0,64933  | -2,63956 | 0,00005 | 0,00421538 | yes |
| ENSDARG0000093702  | si:dkey-126g1.9 | 23:32007051-32014381 | low1C | ctl | OK | 88,9135 | 56,5944 | -0,651742 | -2,68291 | 0,00005 | 0,00421538 | yes |



|                    |                  |                      |       |     |    |         |         |           |          |         |            |     |
|--------------------|------------------|----------------------|-------|-----|----|---------|---------|-----------|----------|---------|------------|-----|
| ENSDARG0000015866  | apoa2            | 16:24063945-24065322 | low1C | ctl | OK | 1613,07 | 1022,26 | -0,658048 | -2,76871 | 0,00005 | 0,00421538 | yes |
| ENSDARG0000079501  | si:ch211-149l1.2 | 1:49031535-49054672  | low1C | ctl | OK | 5,92909 | 3,72392 | -0,670989 | -2,00922 | 0,00005 | 0,0292267  | yes |
| ENSDARG0000094426  | her4.2           | 23:21528600-21534589 | low1C | ctl | OK | 12,4091 | 7,79203 | -0,671324 | -1,94793 | 0,00005 | 0,0292267  | yes |
| ENSDARG0000069583  | CNDP1            | 16:55296447-55320715 | low1C | ctl | OK | 99,3441 | 61,552  | -0,690627 | -2,41782 | 0,00005 | 0,00421538 | yes |
| ENSDARG0000044125  | txn              | 7:24086073-24093669  | low1C | ctl | OK | 164,179 | 101,674 | -0,691309 | -2,76479 | 0,00005 | 0,00421538 | yes |
| ENSDARG0000039605  | mat1a            | 13:18497927-18506252 | low1C | ctl | OK | 68,2073 | 42,1458 | -0,694539 | -2,96607 | 0,00005 | 0,00421538 | yes |
| ENSDARG0000044685  | nr0b2a           | 16:55167504-55172525 | low1C | ctl | OK | 25,5447 | 15,7168 | -0,700714 | -2,82    | 0,00005 | 0,00421538 | yes |
| ENSDARG00000102241 | zgc:136410       | 21:44510840-44518121 | low1C | ctl | OK | 244,221 | 150,241 | -0,700912 | -2,99312 | 0,00005 | 0,00421538 | yes |
| ENSDARG0000043843  | akap7            | 20:2402636-2462287   | low1C | ctl | OK | 47,721  | 29,3512 | -0,701205 | -2,18111 | 0,00025 | 0,0166061  | yes |
| ENSDARG00000102207 | CABZ01102578.1   | KN149735.1:21-4011   | low1C | ctl | OK | 49,3629 | 30,3568 | -0,701407 | -2,56606 | 0,00005 | 0,00421538 | yes |
| ENSDARG00000102356 | scp2b            | 23:41935798-41959885 | low1C | ctl | OK | 15,2217 | 9,35947 | -0,701635 | -2,05842 | 0,00075 | 0,0399757  | yes |
| ENSDARG0000056151  | tyrp1b           | 1:18639899-18653111  | low1C | ctl | OK | 12,4583 | 7,62223 | -0,708821 | -2,17012 | 0,0003  | 0,0193412  | yes |
| ENSDARG0000020143  | pah              | 4:17402703-17420557  | low1C | ctl | OK | 9,93856 | 6,07977 | -0,70902  | -2,28832 | 0,0001  | 0,00772511 | yes |
| ENSDARG0000007421  | ftcd             | 22:12746099-12761755 | low1C | ctl | OK | 11,4088 | 6,85559 | -0,734794 | -2,31605 | 0,00005 | 0,00421538 | yes |
| ENSDARG0000040295  | apoeb            | 16:24045711-24048429 | low1C | ctl | OK | 2292,66 | 1373,62 | -0,739041 | -2,58954 | 0,00005 | 0,00421538 | yes |

|                        |            |                          |       |     |    |         |         |           |              |         |                |     |
|------------------------|------------|--------------------------|-------|-----|----|---------|---------|-----------|--------------|---------|----------------|-----|
| ENSDARG00000<br>019713 | oatx       | 21:44088982-<br>44109518 | low1C | ctl | OK | 6,18077 | 3,69922 | -0,740565 | -<br>2,29352 | 0,0002  | 0,01391<br>75  | yes |
| ENSDARG00000<br>043154 | ucp2       | 10:36706162-<br>36738764 | low1C | ctl | OK | 159,602 | 95,216  | -0,745204 | -<br>3,11804 | 0,00005 | 0,00421<br>538 | yes |
| ENSDARG00000<br>026109 | slc48a1b   | 6:38898621-<br>38904962  | low1C | ctl | OK | 9,87869 | 5,86775 | -0,751513 | -<br>1,99431 | 0,00075 | 0,03997<br>57  | yes |
| ENSDARG00000<br>009018 | rhbg       | 16:29331172-<br>29342541 | low1C | ctl | OK | 7,91003 | 4,68476 | -0,755707 | -2,6598      | 0,00005 | 0,00421<br>538 | yes |
| ENSDARG00000<br>008931 | renbp      | 8:36998539-<br>37011466  | low1C | ctl | OK | 12,3043 | 7,25395 | -0,762329 | -<br>2,53027 | 0,00005 | 0,00421<br>538 | yes |
| ENSDARG00000<br>004296 | ambp       | 10:10843325-<br>10865634 | low1C | ctl | OK | 59,7223 | 35,0215 | -0,770027 | -<br>2,22904 | 0,0001  | 0,00772<br>511 | yes |
| ENSDARG00000<br>098586 | zgc:194887 | 17:443532-<br>449054     | low1C | ctl | OK | 12,3761 | 7,2385  | -0,773793 | -<br>2,02017 | 0,00095 | 0,04640<br>45  | yes |
| ENSDARG00000<br>021004 | c5         | 5:62764793-<br>62816203  | low1C | ctl | OK | 7,10854 | 4,13541 | -0,781524 | -<br>2,84672 | 0,00005 | 0,00421<br>538 | yes |
| ENSDARG00000<br>038668 | gbp1       | 2:42171489-<br>42185905  | low1C | ctl | OK | 4,46901 | 2,59503 | -0,784203 | -<br>2,04376 | 0,0004  | 0,02435<br>56  | yes |
| ENSDARG00000<br>011701 | ctsl       | 5:23802076-<br>23805867  | low1C | ctl | OK | 98,5437 | 57,0847 | -0,787659 | -<br>3,22561 | 0,00005 | 0,00421<br>538 | yes |
| ENSDARG00000<br>058102 | sardh      | 10:10429089-<br>10603580 | low1C | ctl | OK | 15,7799 | 9,09355 | -0,79517  | -<br>3,02206 | 0,00005 | 0,00421<br>538 | yes |
| ENSDARG00000<br>007988 | masp2      | 23:28843683-<br>28869616 | low1C | ctl | OK | 3,20656 | 1,83667 | -0,803938 | -<br>1,91301 | 0,0009  | 0,04470<br>93  | yes |
| ENSDARG00000<br>032862 | ugt5g1     | 7:22420803-<br>22425829  | low1C | ctl | OK | 2,92023 | 1,67056 | -0,805751 | -<br>1,96419 | 0,00085 | 0,04345<br>66  | yes |
| ENSDARG00000<br>100917 | slc30a8    | 19:46751129-<br>46769977 | low1C | ctl | OK | 3,53564 | 2,01954 | -0,807942 | -<br>2,35603 | 0,00005 | 0,00421<br>538 | yes |
| ENSDARG00000<br>104207 | pcyt1bb    | 21:40595567-<br>40607603 | low1C | ctl | OK | 4,38927 | 2,45944 | -0,83565  | -<br>2,02171 | 0,0007  | 0,03824<br>05  | yes |

|                    |                   |                      |       |     |    |         |          |           |          |         |            |     |
|--------------------|-------------------|----------------------|-------|-----|----|---------|----------|-----------|----------|---------|------------|-----|
| ENSDARG0000041595  | ces3              | 18:17429187-17437240 | low1C | ctl | OK | 4,79724 | 2,68507  | -0,837244 | -2,0696  | 0,00025 | 0,0166061  | yes |
| ENSDARG0000036041  | f2                | 7:38479612-38488900  | low1C | ctl | OK | 22,7069 | 12,6385  | -0,845303 | -2,56315 | 0,00005 | 0,00421538 | yes |
| ENSDARG0000019986  | grhprb            | 1:19142865-19152602  | low1C | ctl | OK | 25,1699 | 13,9388  | -0,852597 | -2,79985 | 0,00005 | 0,00421538 | yes |
| ENSDARG0000018264  | trim101           | 23:17528347-17543803 | low1C | ctl | OK | 4,61844 | 2,54509  | -0,859691 | -2,10414 | 0,00025 | 0,0166061  | yes |
| ENSDARG0000039516  | c8a               | 2:2374645-2401596    | low1C | ctl | OK | 7,39509 | 4,05234  | -0,867813 | -1,93952 | 0,00085 | 0,0434566  | yes |
| ENSDARG0000015662  | pla2g12b          | 13:4543111-4555009   | low1C | ctl | OK | 220,906 | 120,727  | -0,871686 | -2,82078 | 0,00005 | 0,00421538 | yes |
| ENSDARG0000017261  | gdpd1             | 15:16950173-16958853 | low1C | ctl | OK | 21,78   | 11,9011  | -0,871915 | -2,31284 | 0,00005 | 0,00421538 | yes |
| ENSDARG0000039099  | zgc:113413        | 7:8127066-8135474    | low1C | ctl | OK | 11,5288 | 6,28308  | -0,875697 | -2,39331 | 0,0001  | 0,00772511 | yes |
| ENSDARG00000102456 | cfhl4             | 22:23587102-23598808 | low1C | ctl | OK | 27,0964 | 14,7468  | -0,877695 | -3,06366 | 0,00005 | 0,00421538 | yes |
| ENSDARG0000074362  | FUT9 (10 of 14)   | 3:51837689-51858158  | low1C | ctl | OK | 1,36298 | 0,741137 | -0,87895  | -2,00294 | 0,00055 | 0,0317263  | yes |
| ENSDARG0000021208  | serpind1          | 8:1736412-1833109    | low1C | ctl | OK | 2,63123 | 1,42265  | -0,887152 | -2,03363 | 0,0007  | 0,0382405  | yes |
| ENSDARG0000043180  | gpd1b             | 22:6966199-6977128   | low1C | ctl | OK | 38,5165 | 20,8083  | -0,888317 | -3,35176 | 0,00005 | 0,00421538 | yes |
| ENSDARG0000042379  | TMEM120A (2 of 2) | 15:16937667-16948890 | low1C | ctl | OK | 3,25067 | 1,74493  | -0,897569 | -1,96797 | 0,001   | 0,0481758  | yes |
| ENSDARG0000091465  | si:dkey-66a8.7    | 6:37463894-37482284  | low1C | ctl | OK | 8,37453 | 4,4659   | -0,907057 | -2,06011 | 0,00075 | 0,0399757  | yes |
| ENSDARG00000101160 | apoa4a            | 19:10927027-10931909 | low1C | ctl | OK | 57,2388 | 30,5163  | -0,907416 | -3,35444 | 0,00005 | 0,00421538 | yes |

|                        |                     |                          |       |     |    |         |         |           |              |         |                |     |
|------------------------|---------------------|--------------------------|-------|-----|----|---------|---------|-----------|--------------|---------|----------------|-----|
| ENSDARG00000<br>012640 | cideb               | 7:23744357-<br>23751183  | low1C | ctl | OK | 10,2017 | 5,4256  | -0,910952 | -<br>2,42492 | 0,00005 | 0,00421<br>538 | yes |
| ENSDARG00000<br>053831 | vtnb                | 21:39022453-<br>39036049 | low1C | ctl | OK | 15,824  | 8,3232  | -0,926906 | -<br>3,11322 | 0,00005 | 0,00421<br>538 | yes |
| ENSDARG00000<br>012694 | c3a.1               | 1:55460925-<br>55507680  | low1C | ctl | OK | 38,0099 | 19,9805 | -0,927787 | -<br>3,88562 | 0,00005 | 0,00421<br>538 | yes |
| ENSDARG00000<br>028396 | fkbp5               | 6:41098521-<br>41118517  | low1C | ctl | OK | 2,00912 | 1,05375 | -0,931027 | -1,9438      | 0,0009  | 0,04470<br>93  | yes |
| ENSDARG00000<br>027529 | hmox1a              | 3:25880610-<br>25886721  | low1C | ctl | OK | 31,1266 | 16,2143 | -0,940885 | -<br>3,43317 | 0,00005 | 0,00421<br>538 | yes |
| ENSDARG00000<br>055278 | cfb                 | 21:27379588-<br>27394702 | low1C | ctl | OK | 11,3318 | 5,83059 | -0,958665 | -<br>3,16588 | 0,00005 | 0,00421<br>538 | yes |
| ENSDARG00000<br>069828 | ABHD12B (1<br>of 2) | 13:9546520-<br>9554556   | low1C | ctl | OK | 5,8994  | 3,00715 | -0,972168 | -<br>2,25808 | 0,00015 | 0,01096        | yes |
| ENSDARG00000<br>055504 | CD68                | 7:19231023-<br>19239661  | low1C | ctl | OK | 42,9579 | 21,8613 | -0,974547 | -<br>3,80529 | 0,00005 | 0,00421<br>538 | yes |
| ENSDARG00000<br>021250 | slc25a48            | 14:25293357-<br>25301757 | low1C | ctl | OK | 7,05456 | 3,56837 | -0,98329  | -<br>2,48427 | 0,00005 | 0,00421<br>538 | yes |
| ENSDARG00000<br>045299 | vmo1b               | 21:1592356-<br>1600152   | low1C | ctl | OK | 8,92733 | 4,43559 | -1,0091   | -<br>2,63154 | 0,00005 | 0,00421<br>538 | yes |
| ENSDARG00000<br>036966 | hsd3b7              | 3:32612231-<br>32646536  | low1C | ctl | OK | 4,56532 | 2,25638 | -1,0167   | -<br>2,48412 | 0,0001  | 0,00772<br>511 | yes |
| ENSDARG00000<br>016793 | crybb1l2            | 1:43720616-<br>43745614  | low1C | ctl | OK | 11,1663 | 5,50707 | -1,0198   | -<br>2,54998 | 0,0001  | 0,00772<br>511 | yes |
| ENSDARG00000<br>102594 | zgc:194627          | 22:5048518-<br>5057287   | low1C | ctl | OK | 5,7333  | 2,82455 | -1,02135  | -<br>2,17409 | 0,00025 | 0,01660<br>61  | yes |
| ENSDARG00000<br>023111 | plg                 | 20:42791377-<br>42805774 | low1C | ctl | OK | 16,3043 | 8,00017 | -1,02715  | -<br>3,80501 | 0,00005 | 0,00421<br>538 | yes |
| ENSDARG00000<br>086998 | NNMT                | 11:11991086-<br>11996233 | low1C | ctl | OK | 3,21547 | 1,57418 | -1,03043  | -<br>2,53945 | 0,00005 | 0,00421<br>538 | yes |

|                    |                    |                       |       |     |    |         |          |          |          |         |            |     |
|--------------------|--------------------|-----------------------|-------|-----|----|---------|----------|----------|----------|---------|------------|-----|
| ENSDARG0000070038  | rbp2a              | 15:5815606-5827155    | low1C | ctl | OK | 25,941  | 12,6644  | -1,03445 | -2,82306 | 0,00005 | 0,00421538 | yes |
| ENSDARG0000068883  | tspan13a           | 15:34734245-34741801  | low1C | ctl | OK | 1,90561 | 0,92527  | -1,0423  | -2,53098 | 0,00005 | 0,00421538 | yes |
| ENSDARG0000040298  | apoa4b.1           | 16:23999037-24033538  | low1C | ctl | OK | 459,546 | 222,625  | -1,04559 | -3,5463  | 0,00005 | 0,00421538 | yes |
| ENSDARG0000090637  | myh6               | 20:53772084-53778019  | low1C | ctl | OK | 1,1424  | 0,547594 | -1,06089 | -2,51168 | 0,00005 | 0,00421538 | yes |
| ENSDARG0000036171  | rnasel3            | 14:38313985-38316149  | low1C | ctl | OK | 8,43185 | 4,01492  | -1,07048 | -2,57261 | 0,00005 | 0,00421538 | yes |
| ENSDARG00000103875 | CABZ01048402.2     | KN149946.1:4414-12640 | low1C | ctl | OK | 10,4874 | 4,98327  | -1,07349 | -3,17466 | 0,00005 | 0,00421538 | yes |
| ENSDARG00000100442 | cfh                | 22:23615378-23721721  | low1C | ctl | OK | 15,0285 | 7,12577  | -1,07659 | -3,42888 | 0,00005 | 0,00421538 | yes |
| ENSDARG0000006220  | ugt1ab             | 9:9998613-10032338    | low1C | ctl | OK | 2,541   | 1,176    | -1,11151 | -2,07416 | 0,0002  | 0,0139175  | yes |
| ENSDARG0000090722  | C20H6orf58(1 of 2) | 20:1391366-1400179    | low1C | ctl | OK | 9,92906 | 4,57242  | -1,1187  | -2,99203 | 0,00005 | 0,00421538 | yes |
| ENSDARG0000019260  | dhrs9              | 9:49008552-49038903   | low1C | ctl | OK | 4,13832 | 1,90015  | -1,12293 | -2,37763 | 0,00015 | 0,01096    | yes |
| ENSDARG0000035257  | akr1a1a            | 5:40920885-40931476   | low1C | ctl | OK | 6,89005 | 3,16205  | -1,12366 | -2,56243 | 0,00005 | 0,00421538 | yes |
| ENSDARG0000020741  | fga                | 1:9379389-9387428     | low1C | ctl | OK | 61,1514 | 28,0576  | -1,124   | -3,75197 | 0,00005 | 0,00421538 | yes |
| ENSDARG00000103800 | prkar1b            | 3:12853207-12927273   | low1C | ctl | OK | 2,67944 | 1,22466  | -1,12955 | -2,09845 | 0,00075 | 0,0399757  | yes |
| ENSDARG0000070394  | uroc1              | 6:40041997-40061183   | low1C | ctl | OK | 2,36611 | 1,06975  | -1,14524 | -2,56455 | 0,00005 | 0,00421538 | yes |
| ENSDARG0000070168  | sod3a              | 7:71096759-71105633   | low1C | ctl | OK | 12,8364 | 5,76171  | -1,15567 | -3,17641 | 0,00005 | 0,00421538 | yes |

|                        |                     |                          |       |     |    |              |              |          |              |         |                |     |
|------------------------|---------------------|--------------------------|-------|-----|----|--------------|--------------|----------|--------------|---------|----------------|-----|
| ENSDARG00000<br>097606 | tmem82              | 23:24558931-<br>24562155 | low1C | ctl | OK | 2,37724      | 1,0541       | -1,17327 | -<br>1,96684 | 0,0009  | 0,04470<br>93  | yes |
| ENSDARG00000<br>030508 | CCDC134 (1<br>of 2) | 3:662600-671629          | low1C | ctl | OK | 13,1682      | 5,83316      | -1,17471 | -<br>3,05492 | 0,00005 | 0,00421<br>538 | yes |
| ENSDARG00000<br>078918 | comtd1              | 13:17541534-<br>17554353 | low1C | ctl | OK | 10,0345      | 4,39039      | -1,19255 | -<br>1,98241 | 0,00095 | 0,04640<br>45  | yes |
| ENSDARG00000<br>070918 | FETUB (2 of<br>2)   | 22:38276173-<br>38287021 | low1C | ctl | OK | 4,13355      | 1,80788      | -1,19308 | -<br>2,36985 | 0,00005 | 0,00421<br>538 | yes |
| ENSDARG00000<br>001975 | hsd11b2             | 7:34840574-<br>34854897  | low1C | ctl | OK | 1,54465      | 0,65775<br>2 | -1,23167 | -<br>2,38257 | 0,0001  | 0,00772<br>511 | yes |
| ENSDARG00000<br>104576 | PPP1R3G             | 24:2827465-<br>2830305   | low1C | ctl | OK | 4,53467      | 1,92605      | -1,23535 | -<br>3,34052 | 0,00005 | 0,00421<br>538 | yes |
| ENSDARG00000<br>062483 | lyve1b              | 18:16755246-<br>16758322 | low1C | ctl | OK | 3,18741      | 1,33223      | -1,25854 | -<br>2,06028 | 0,0008  | 0,04187<br>7   | yes |
| ENSDARG00000<br>002764 | miox                | 18:6773232-<br>6783325   | low1C | ctl | OK | 5,72136      | 2,38499      | -1,26237 | -<br>2,89301 | 0,00005 | 0,00421<br>538 | yes |
| ENSDARG00000<br>078068 | abcg4b              | 15:23552464-<br>23572949 | low1C | ctl | OK | 1,12579      | 0,46681<br>3 | -1,27002 | -1,7488      | 0,0009  | 0,04470<br>93  | yes |
| ENSDARG00000<br>034063 | CABZ01068<br>208.1  | 17:53294819-<br>53301747 | low1C | ctl | OK | 8,26714      | 3,37669      | -1,29178 | -<br>3,61965 | 0,00005 | 0,00421<br>538 | yes |
| ENSDARG00000<br>061303 | oca2                | 6:37881001-<br>38060286  | low1C | ctl | OK | 0,59536<br>2 | 0,24048<br>7 | -1,30781 | -<br>2,03503 | 0,0003  | 0,01934<br>12  | yes |
| ENSDARG00000<br>058005 | hgd                 | 24:23814312-<br>23825872 | low1C | ctl | OK | 3,1484       | 1,26771      | -1,31239 | -<br>2,61482 | 0,00005 | 0,00421<br>538 | yes |
| ENSDARG00000<br>068114 | f11r.2              | 5:29220112-<br>29225693  | low1C | ctl | OK | 3,18278      | 1,26905      | -1,32653 | -<br>2,55111 | 0,00005 | 0,00421<br>538 | yes |
| ENSDARG00000<br>104702 | cat                 | 25:7318705-<br>7328383   | low1C | ctl | OK | 8,61644      | 3,36905      | -1,35475 | -<br>3,86358 | 0,00005 | 0,00421<br>538 | yes |
| ENSDARG00000<br>043719 | c3a.6               | 1:55360637-<br>55410849  | low1C | ctl | OK | 2,29302      | 0,89601<br>2 | -1,35566 | -<br>2,84294 | 0,00005 | 0,00421<br>538 | yes |

|                   |                   |                      |       |     |    |          |          |          |          |         |            |     |
|-------------------|-------------------|----------------------|-------|-----|----|----------|----------|----------|----------|---------|------------|-----|
| ENSDARG0000055036 | itih3a            | 11:3594938-3609829   | low1C | ctl | OK | 6,79873  | 2,60843  | -1,38208 | -1,98978 | 0,00085 | 0,0434566  | yes |
| ENSDARG0000080001 | si:dkey-208m12.2  | 22:27489647-27499674 | low1C | ctl | OK | 0,63409  | 0,239511 | -1,4046  | -2,4085  | 0,00015 | 0,01096    | yes |
| ENSDARG0000019772 | si:ch1073-280e3.1 | 15:517687-535747     | low1C | ctl | OK | 1,14719  | 0,429375 | -1,41779 | -2,28102 | 0,00015 | 0,01096    | yes |
| ENSDARG0000008969 | fgb               | 1:9367651-9375385    | low1C | ctl | OK | 54,0108  | 20,1926  | -1,41942 | -4,86742 | 0,00005 | 0,00421538 | yes |
| ENSDARG0000019532 | fads2             | 25:4007595-4023060   | low1C | ctl | OK | 9,36146  | 3,37539  | -1,47168 | -3,71563 | 0,00005 | 0,00421538 | yes |
| ENSDARG0000069524 | si:dkey-30c15.13  | 18:7436733-7441140   | low1C | ctl | OK | 2,86276  | 1,02679  | -1,47927 | -2,1668  | 0,00065 | 0,0365333  | yes |
| ENSDARG0000095556 | si:dkey-238c7.12  | 18:7607071-7609022   | low1C | ctl | OK | 317,685  | 112,742  | -1,49458 | -5,82955 | 0,00005 | 0,00421538 | yes |
| ENSDARG0000093774 | rbp2b             | 2:39050426-39052199  | low1C | ctl | OK | 7,35546  | 2,60887  | -1,49539 | -3,29748 | 0,00005 | 0,00421538 | yes |
| ENSDARG0000037281 | fgg               | 1:24978969-24988554  | low1C | ctl | OK | 39,5484  | 13,9832  | -1,49992 | -5,40795 | 0,00005 | 0,00421538 | yes |
| ENSDARG0000038405 | zgc:153921        | 3:1236409-1293074    | low1C | ctl | OK | 3,43906  | 1,20714  | -1,51042 | -2,3636  | 0,00015 | 0,01096    | yes |
| ENSDARG0000041623 | mt2               | 18:17545560-17546913 | low1C | ctl | OK | 148,921  | 52,0557  | -1,51642 | -5,39305 | 0,00005 | 0,00421538 | yes |
| ENSDARG0000058053 | serping1          | 8:13922949-14014644  | low1C | ctl | OK | 5,97046  | 1,99858  | -1,57887 | -2,18677 | 0,0008  | 0,041877   | yes |
| ENSDARG0000098642 | PRKAR1B           | 3:12966603-12987150  | low1C | ctl | OK | 4,62288  | 1,53756  | -1,58815 | -2,16312 | 0,0005  | 0,0292267  | yes |
| ENSDARG0000055705 | f5                | 9:34317820-34338811  | low1C | ctl | OK | 0,847765 | 0,279409 | -1,60129 | -3,23789 | 0,00005 | 0,00421538 | yes |
| ENSDARG0000051912 | HPX (2 of 2)      | 16:2883517-2903388   | low1C | ctl | OK | 5,81375  | 1,85502  | -1,64803 | -3,59037 | 0,00005 | 0,00421538 | yes |

|                    |                     |                      |       |     |    |          |          |          |          |         |            |     |
|--------------------|---------------------|----------------------|-------|-----|----|----------|----------|----------|----------|---------|------------|-----|
| ENSDARG0000053448  | si:ch211-251f6.6    | 10:8086654-8121037   | low1C | ctl | OK | 8,40464  | 2,67507  | -1,65161 | -2,90939 | 0,00005 | 0,00421538 | yes |
| ENSDARG0000059651  | cidec               | 6:19142441-19151867  | low1C | ctl | OK | 1,35284  | 0,4201   | -1,68719 | -2,38887 | 0,00025 | 0,0166061  | yes |
| ENSDARG00000104572 | si:dkeyp-35h6.1     | 14:12730545-12742341 | low1C | ctl | OK | 0,826825 | 0,254983 | -1,69718 | -2,89777 | 0,0001  | 0,00772511 | yes |
| ENSDARG00000023151 | ucp1                | 1:52687139-52869865  | low1C | ctl | OK | 32,2487  | 9,70759  | -1,73206 | -2,19391 | 0,0009  | 0,0447093  | yes |
| ENSDARG00000102722 | itih3b              | 11:36910727-36932766 | low1C | ctl | OK | 1,95999  | 0,589179 | -1,73407 | -3,02909 | 0,00005 | 0,00421538 | yes |
| ENSDARG00000095751 | C20H6orf58 (2 of 2) | 20:1377737-1385482   | low1C | ctl | OK | 5,00379  | 1,43982  | -1,79714 | -3,57317 | 0,00005 | 0,00421538 | yes |
| ENSDARG00000104329 | NOTCH4              | 8:19482208-19488256  | low1C | ctl | OK | 2,09065  | 0,583178 | -1,84194 | -2,45134 | 0,0001  | 0,00772511 | yes |
| ENSDARG00000033227 | lect2l              | 14:36545209-36546752 | low1C | ctl | OK | 4,88051  | 1,32495  | -1,88109 | -2,92566 | 0,00005 | 0,00421538 | yes |
| ENSDARG00000057498 | habp2               | 12:31598336-31605164 | low1C | ctl | OK | 1,25656  | 0,339267 | -1,88899 | -2,68412 | 0,0001  | 0,00772511 | yes |
| ENSDARG00000004199 | spam1               | 25:27092796-27121034 | low1C | ctl | OK | 2,0474   | 0,516569 | -1,98676 | -3,07535 | 0,00005 | 0,00421538 | yes |
| ENSDARG00000069630 | tat                 | 18:13194009-13210998 | low1C | ctl | OK | 1,3746   | 0,341749 | -2,008   | -2,954   | 0,00005 | 0,00421538 | yes |
| ENSDARG00000029230 | pnp4b               | 16:36854039-36880749 | low1C | ctl | OK | 6,00324  | 1,46967  | -2,03025 | -2,93947 | 0,00005 | 0,00421538 | yes |
| ENSDARG00000005616 | bfb                 | 21:27401171-27407300 | low1C | ctl | OK | 1,64486  | 0,399621 | -2,04126 | -2,20636 | 0,0006  | 0,0340505  | yes |
| ENSDARG00000079589 | si:dkeyp-73d8.6     | 2:32638458-32641359  | low1C | ctl | OK | 3,96679  | 0,961289 | -2,04493 | -3,01373 | 0,00005 | 0,00421538 | yes |
| ENSDARG00000070892 | si:ch211-262h13.5   | 22:38825803-38832858 | low1C | ctl | OK | 1,83778  | 0,444732 | -2,04696 | -1,99969 | 0,0007  | 0,0382405  | yes |



|                   |                   |                      |       |     |    |          |          |          |          |         |            |     |
|-------------------|-------------------|----------------------|-------|-----|----|----------|----------|----------|----------|---------|------------|-----|
| ENSDARG0000057844 | zgc:171470        | 1:56783698-56787039  | low1C | ctl | OK | 0,724686 | 0,174454 | -2,05451 | -2,30173 | 0,0008  | 0,041877   | yes |
| ENSDARG0000036776 | aldh8a1           | 23:31826072-31837222 | low1C | ctl | OK | 3,82032  | 0,909964 | -2,06981 | -3,99034 | 0,00005 | 0,00421538 | yes |
| ENSDARG0000069293 | ahsg2             | 2:10336524-10343921  | low1C | ctl | OK | 4,26364  | 0,988052 | -2,10943 | -3,73366 | 0,00005 | 0,00421538 | yes |
| ENSDARG0000070960 | si:ch211-288g17.4 | 19:9425245-9445417   | low1C | ctl | OK | 2,13304  | 0,482005 | -2,14579 | -1,52113 | 0,0005  | 0,0292267  | yes |
| ENSDARG0000017444 | hal               | 25:7830047-7850402   | low1C | ctl | OK | 0,542073 | 0,121139 | -2,16182 | -2,28282 | 0,00075 | 0,0399757  | yes |
| ENSDARG0000075614 | zgc:193682        | 16:24060897-24062096 | low1C | ctl | OK | 2,90979  | 0,649827 | -2,16279 | -2,1112  | 0,00045 | 0,0270247  | yes |
| ENSDARG0000076043 | si:dkeyp-73d8.9   | 2:32659119-32660520  | low1C | ctl | OK | 3,67177  | 0,721929 | -2,34655 | -2,6387  | 0,00005 | 0,00421538 | yes |
| ENSDARG0000003523 | itln3             | 14:16039349-16046556 | low1C | ctl | OK | 2,12752  | 0,418031 | -2,34749 | -2,38528 | 0,00015 | 0,01096    | yes |
| ENSDARG0000026764 | ahsg1             | 22:37920795-37927972 | low1C | ctl | OK | 13,3256  | 2,37475  | -2,48835 | -5,18307 | 0,00005 | 0,00421538 | yes |
| ENSDARG0000089310 | gc                | 5:45077667-45124680  | low1C | ctl | OK | 1,9247   | 0,337728 | -2,5107  | -3,01755 | 0,00005 | 0,00421538 | yes |
| ENSDARG0000036833 | upp2              | 9:16160545-16171735  | low1C | ctl | OK | 1,18104  | 0,207058 | -2,51195 | -2,82978 | 0,00005 | 0,00421538 | yes |
| ENSDARG0000012609 | hpx               | 9:33029367-33046387  | low1C | ctl | OK | 11,8579  | 2,00551  | -2,56381 | -4,82225 | 0,00005 | 0,00421538 | yes |
| ENSDARG0000033662 | scd               | 12:48407392-48421350 | low1C | ctl | OK | 2,31884  | 0,385292 | -2,58938 | -3,79447 | 0,00005 | 0,00421538 | yes |
| ENSDARG0000043196 | rnasel2           | 22:6263716-6264903   | low1C | ctl | OK | 6,0136   | 0,959942 | -2,64721 | -3,9494  | 0,00005 | 0,00421538 | yes |
| ENSDARG0000019492 | shbg              | 12:22389795-22403169 | low1C | ctl | OK | 3,11543  | 0,464251 | -2,74646 | -4,0449  | 0,00005 | 0,00421538 | yes |

|                        |                       |                          |       |     |    |         |              |          |              |         |                |     |
|------------------------|-----------------------|--------------------------|-------|-----|----|---------|--------------|----------|--------------|---------|----------------|-----|
| ENSDARG00000<br>018351 | hpda                  | 5:2544819-<br>2582076    | low1C | ctl | OK | 16,4833 | 2,3534       | -2,80819 | -<br>6,92359 | 0,00005 | 0,00421<br>538 | yes |
| ENSDARG00000<br>071216 | ENDOD1 (5<br>of 11)   | 19:3359896-<br>3363097   | low1C | ctl | OK | 1,02493 | 0,14391<br>6 | -2,83223 | -<br>2,98292 | 0,00006 | 0,03405<br>05  | yes |
| ENSDARG00000<br>071076 | ldhbb                 | 25:3201140-<br>3210843   | low1C | ctl | OK | 11,5261 | 1,60021      | -2,84857 | -<br>4,07473 | 0,00005 | 0,00421<br>538 | yes |
| ENSDARG00000<br>092858 | si:ch1073-<br>126c3.2 | 13:20404176-<br>20409808 | low1C | ctl | OK | 2,42633 | 0,32743<br>7 | -2,88949 | -2,7914      | 0,00001 | 0,00772<br>511 | yes |
| ENSDARG00000<br>038439 | fabp10a               | 16:52626256-<br>52631239 | low1C | ctl | OK | 452,537 | 53,2093      | -3,08829 | -<br>6,06516 | 0,00005 | 0,00421<br>538 | yes |
| ENSDARG00000<br>019294 | cbln8                 | 7:73231372-<br>73233805  | low1C | ctl | OK | 22,2043 | 2,3374       | -3,24786 | -<br>6,33203 | 0,00005 | 0,00421<br>538 | yes |
| ENSDARG00000<br>098898 | si:dkey-<br>20i20.15  | 22:1474765-<br>1476208   | low1C | ctl | OK | 192,988 | 0,78666<br>6 | -7,93855 | -<br>4,31097 | 0,00005 | 0,00421<br>538 | yes |

**Table S5:** Complete list of significantly altered Gene Ontologies for biological processes, molecular function and cellular components for differentially expressed genes in low 1-C compared to control F<sub>1</sub> embryos. The significant GO terms with altered genes, p-value and Benjamini.

| <b>Biological process</b>               |               | <b>Genes</b>                                                                     | <b>P-value</b> | <b>Benjamini</b>                                                                                                                                             |           |           |
|-----------------------------------------|---------------|----------------------------------------------------------------------------------|----------------|--------------------------------------------------------------------------------------------------------------------------------------------------------------|-----------|-----------|
| <b>Inflammatory and immune response</b> |               | 29                                                                               |                |                                                                                                                                                              |           |           |
| 1                                       | GOTERM_BP_FAT | GO:0009611~response to wounding                                                  | 25             | F11R, MASP2, C3, CFB, F13A1, C5, SERPING1, CDO1, PLG, AHSG, C8A, FGG, APOA2, LYVE1, FGA, F5, SERPINF2, FGB, HMOX1, F2, SERPINC1, CFH, SERPINA1, C2, SERPIND1 | 3,05E-012 | 3,97E-009 |
| 2                                       | GOTERM_BP_FAT | GO:0002526~acute inflammatory response                                           | 13             | C8A, APOA2, CFB, SERPINF2, C3, MASP2, F2, C5, CFH, SERPING1, SERPINA1, C2, AHSG                                                                              | 1,65E-011 | 1,07E-008 |
| 8                                       | GOTERM_BP_FAT | GO:0006956~complement activation                                                 | 8              | C8A, C3, MASP2, CFB, C5, CFH, SERPING1, C2                                                                                                                   | 3,64E-008 | 6,77E-006 |
| 9                                       | GOTERM_BP_FAT | GO:0002541~activation of plasma proteins involved in acute inflammatory response | 8              | C8A, C3, MASP2, CFB, C5, CFH, SERPING1, C2                                                                                                                   | 4,32E-008 | 7,03E-006 |
| 10                                      | GOTERM_BP_FAT | GO:0006954~inflammatory response                                                 | 16             | F11R, MASP2, C3, CFB, C5, SERPING1, CDO1, AHSG, C8A, APOA2, SERPINF2, HMOX1, F2, CFH, SERPINA1, C2                                                           | 4,32E-008 | 6,25E-006 |
| 11                                      | GOTERM_BP_FAT | GO:0006957~complement activation, alternative pathway                            | 6              | C8A, C3, CFB, C5, CFH, C2                                                                                                                                    | 8,33E-008 | 1,08E-005 |
| 14                                      | GOTERM_BP_FAT | GO:0042060~wound healing                                                         | 12             | FGG, FGA, F5, FGB, HMOX1, F13A1, F2, SERPINC1, SERPING1, SERPINA1, SERPIND1, PLG                                                                             | 3,49E-007 | 3,79E-005 |
| 18                                      | GOTERM_BP_FAT | GO:0006952~defense response                                                      | 19             | TCIRG1, F11R, CFB, MASP2, C3, C5, SERPING1, CDO1, AHSG, APOA4, C8A, APOA2, SERPINF2, HMOX1, F2, CFH, SERPINA1, C2, APOM                                      | 1,62E-006 | 1,41E-004 |
| 21                                      | GOTERM_BP_FAT | GO:0006958~complement activation, classical pathway                              | 6              | C8A, C3, MASP2, C5, SERPING1, C2                                                                                                                             | 3,01E-006 | 2,30E-004 |
| 22                                      | GOTERM_BP_FAT | GO:0006959~humoral immune response                                               | 8              | C8A, C3, MASP2, CFB, C5, CFH, SERPING1, C2                                                                                                                   | 3,07E-006 | 2,22E-004 |
| 23                                      | GOTERM_BP_FAT | GO:0002455~humoral immune response mediated by circulating immunoglobulin        | 6              | C8A, C3, MASP2, C5, SERPING1, C2                                                                                                                             | 4,26E-006 | 2,91E-004 |
| 26                                      | GOTERM_BP_FAT | GO:0002253~activation of immune response                                         | 8              | C8A, C3, MASP2, CFB, C5, CFH, SERPING1, C2                                                                                                                   | 9,83E-006 | 5,81E-004 |
| 30                                      | GOTERM_BP_FAT | GO:0045087~innate immune response                                                | 9              | C8A, APOA4, C3, MASP2, CFB, C5, CFH, SERPING1, C2                                                                                                            | 1,43E-005 | 7,43E-004 |
| 35                                      | GOTERM_BP_FAT | GO:0050778~positive regulation of immune response                                | 9              | C8A, C3, MASP2, CFB, HPX, C5, CFH, SERPING1, C2                                                                                                              | 2,05E-005 | 9,51E-004 |
| 48                                      | GOTERM_BP_FAT | GO:0016064~immunoglobulin mediated immune response                               | 6              | C8A, C3, MASP2, C5, SERPING1, C2                                                                                                                             | 6,85E-005 | 2,22E-003 |
| 50                                      | GOTERM_BP_FAT | GO:0019724~B cell mediated immunity                                              | 6              | C8A, C3, MASP2, C5, SERPING1, C2                                                                                                                             | 8,16E-005 | 2,53E-003 |
| 51                                      | GOTERM_BP_FAT | GO:0002252~immune effector process                                               | 8              | C8A, C3, MASP2, CFB, C5, CFH, SERPING1, C2                                                                                                                   | 9,71E-005 | 2,93E-003 |

|                                                                   |               |                                                                                                                                      |    |                                                                                                                                                        |           |           |
|-------------------------------------------------------------------|---------------|--------------------------------------------------------------------------------------------------------------------------------------|----|--------------------------------------------------------------------------------------------------------------------------------------------------------|-----------|-----------|
| 57                                                                | GOTERM_BP_FAT | GO:0002449~lymphocyte mediated immunity                                                                                              | 6  | C8A, C3, MASP2, C5, SERPING1, C2                                                                                                                       | 2,37E-004 | 6,27E-003 |
| 64                                                                | GOTERM_BP_FAT | GO:0002460~adaptive immune response based on somatic recombination of immune receptors built from immunoglobulin superfamily domains | 6  | C8A, C3, MASP2, C5, SERPING1, C2                                                                                                                       |           |           |
| 65                                                                | GOTERM_BP_FAT | GO:0002250~adaptive immune response                                                                                                  | 6  | C8A, C3, MASP2, C5, SERPING1, C2                                                                                                                       | 3,70E-004 | 8,56E-003 |
| <b>Oxidation reduction</b>                                        |               |                                                                                                                                      |    | 29                                                                                                                                                     |           |           |
| 3                                                                 | GOTERM_BP_FAT | GO:0055114~oxidation reduction                                                                                                       | 23 | ALDH8A1, GPD1, LDHB, TYRP1, HSD3B7, SCD, FADS2, DHRS9, HGD, NDUFA13, PAH, GRHPR, CDO1, SOD3, F5, HMOX1, TXN, MIOX, HSD11B2, HSD17B4, CAT, QSOX1, SARDH | 5,04E-009 | 2,19E-006 |
| 63                                                                | GOTERM_BP_FAT | GO:0006979~response to oxidative stress                                                                                              | 8  | APOA4, EPAS1, APOE, UCP2, HMOX1, SEPP1, CAT, TAT                                                                                                       | 3,38E-004 | 7,97E-003 |
| <b>Blood coagulation, hemostasis, wound healing</b>               |               |                                                                                                                                      |    | 12                                                                                                                                                     |           |           |
| 4                                                                 | GOTERM_BP_FAT | GO:0050817~coagulation                                                                                                               | 11 | FGG, FGA, F5, FGB, F13A1, F2, SERPINC1, SERPING1, SERPINA1, SERPIND1, PLG                                                                              | 7,96E-009 | 2,59E-006 |
| 5                                                                 | GOTERM_BP_FAT | GO:0007596~blood coagulation                                                                                                         | 11 | FGG, FGA, F5, FGB, F13A1, F2, SERPINC1, SERPING1, SERPINA1, SERPIND1, PLG                                                                              | 7,96E-009 | 2,59E-006 |
| 6                                                                 | GOTERM_BP_FAT | GO:0007599~hemostasis                                                                                                                | 11 | FGG, FGA, F5, FGB, F13A1, F2, SERPINC1, SERPING1, SERPINA1, SERPIND1, PLG                                                                              | 1,39E-008 | 3,62E-006 |
| 7                                                                 | GOTERM_BP_FAT | GO:0050878~regulation of body fluid levels                                                                                           | 12 | FGG, FGA, F5, FGB, F13A1, F2, SERPINC1, HSD11B2, SERPING1, SERPINA1, SERPIND1, PLG                                                                     | 1,55E-008 | 3,36E-006 |
| <b>Processing of proteins, carboxylic- and amino acids</b>        |               |                                                                                                                                      |    | 20                                                                                                                                                     |           |           |
| 12                                                                | GOTERM_BP_FAT | GO:0046395~carboxylic acid catabolic process                                                                                         | 10 | PLA2G15, HAL, HGD, PAH, HSD17B4, UROC1, CDO1, TAT, SARDH, CPT1A                                                                                        | 2,41E-007 | 2,86E-005 |
| 13                                                                | GOTERM_BP_FAT | GO:0016054~organic acid catabolic process                                                                                            | 10 | PLA2G15, HAL, HGD, PAH, HSD17B4, UROC1, CDO1, TAT, SARDH, CPT1A                                                                                        | 2,41E-007 | 2,86E-005 |
| 24                                                                | GOTERM_BP_FAT | GO:0051605~protein maturation by peptide bond cleavage                                                                               | 8  | C8A, C3, MASP2, CFB, C5, CFH, SERPING1, C2                                                                                                             | 5,44E-006 | 3,54E-004 |
| 31                                                                | GOTERM_BP_FAT | GO:0009063~cellular amino acid catabolic process                                                                                     | 7  | HAL, HGD, PAH, UROC1, CDO1, TAT, SARDH                                                                                                                 | 1,65E-005 | 8,25E-004 |
| 37                                                                | GOTERM_BP_FAT | GO:0016485~protein processing                                                                                                        | 8  | C8A, C3, MASP2, CFB, C5, CFH, SERPING1, C2                                                                                                             | 3,09E-005 | 0,00134   |
| 39                                                                | GOTERM_BP_FAT | GO:0009310~amine catabolic process                                                                                                   | 7  | HAL, HGD, PAH, UROC1, CDO1, TAT, SARDH                                                                                                                 | 3,63E-005 | 1,47E-003 |
| 46                                                                | GOTERM_BP_FAT | GO:0051604~protein maturation                                                                                                        | 8  | C8A, C3, MASP2, CFB, C5, CFH, SERPING1, C2                                                                                                             | 5,36E-005 | 0,00183   |
| <b>Lipid transport and metabolic processing (eg. cholesterol)</b> |               |                                                                                                                                      |    | 28                                                                                                                                                     |           |           |
| 15                                                                | GOTERM_BP_FAT | GO:0030301~cholesterol transport                                                                                                     | 7  | APOA4, APOA2, APOB, NPC2, APOE, ABCG4, APOM                                                                                                            | 4,28E-007 | 4,28E-005 |
| 16                                                                | GOTERM_BP_FAT | GO:0015918~sterol transport                                                                                                          | 7  | APOA4, APOA2, APOB, NPC2, APOE, ABCG4, APOM                                                                                                            | 4,28E-007 | 4,28E-005 |

|    |               |                                                             |    |                                                                         |           |           |
|----|---------------|-------------------------------------------------------------|----|-------------------------------------------------------------------------|-----------|-----------|
| 17 | GOTERM_BP_FAT | GO:0010035~response to inorganic substance                  | 12 | APOA4, FGG, APOB, FGA, APOE, FGB, UCP2, HMOX1, SERPINA1, CAT, TAT, SOD3 | 7,07E-007 | 6,57E-005 |
| 19 | GOTERM_BP_FAT | GO:0065005~protein-lipid complex assembly                   | 5  | APOA4, APOA2, APOB, APOE, APOM                                          | 1,81E-006 | 1,47E-004 |
| 20 | GOTERM_BP_FAT | GO:0034377~plasma lipoprotein particle assembly             | 5  | APOA4, APOA2, APOB, APOE, APOM                                          | 1,81E-006 | 1,47E-004 |
| 25 | GOTERM_BP_FAT | GO:0034381~lipoprotein particle clearance                   | 5  | APOA2, APOB, APOE, HMOX1, APOM                                          | 6,49E-006 | 4,02E-004 |
| 27 | GOTERM_BP_FAT | GO:0042632~cholesterol homeostasis                          | 6  | APOA4, APOA2, APOB, NPC2, APOE, APOM                                    | 1,20E-005 | 6,80E-004 |
| 28 | GOTERM_BP_FAT | GO:0055092~sterol homeostasis                               | 6  | APOA4, APOA2, APOB, NPC2, APOE, APOM                                    | 1,20E-005 | 6,80E-004 |
| 29 | GOTERM_BP_FAT | GO:0033344~cholesterol efflux                               | 5  | APOA4, APOA2, APOE, ABCG4, APOM                                         | 1,36E-005 | 7,36E-004 |
| 32 | GOTERM_BP_FAT | GO:0034369~plasma lipoprotein particle remodeling           | 5  | APOA4, APOA2, APOB, APOE, APOM                                          | 1,69E-005 | 8,12E-004 |
| 33 | GOTERM_BP_FAT | GO:0034367~macromolecular complex remodeling                | 5  | APOA4, APOA2, APOB, APOE, APOM                                          | 1,69E-005 | 8,12E-004 |
| 34 | GOTERM_BP_FAT | GO:0034368~protein-lipid complex remodeling                 | 5  | APOA4, APOA2, APOB, APOE, APOM                                          | 1,69E-005 | 8,12E-004 |
| 36 | GOTERM_BP_FAT | GO:0006641~triglyceride metabolic process                   | 6  | APOA4, APOA2, APOB, APOE, CAT, LIPF                                     | 2,23E-005 | 1,00E-003 |
| 38 | GOTERM_BP_FAT | GO:0008202~steroid metabolic process                        | 10 | GC, APOA4, APOA2, APOB, HSD3B7, APOE, HSD11B2, DHRS9, CAT, SCP2         | 3,37E-005 | 1,41E-003 |
| 41 | GOTERM_BP_FAT | GO:0006639~acylglycerol metabolic process                   | 6  | APOA4, APOA2, APOB, APOE, CAT, LIPF                                     | 4,26E-005 | 1,63E-003 |
| 42 | GOTERM_BP_FAT | GO:0046486~glycerolipid metabolic process                   | 9  | APOA4, GPD1, APOA2, APOB, PLA2G15, APOE, PCYT1B, CAT, LIPF              | 4,54E-005 | 1,69E-003 |
| 43 | GOTERM_BP_FAT | GO:0006638~neutral lipid metabolic process                  | 6  | APOA4, APOA2, APOB, APOE, CAT, LIPF                                     | 4,70E-005 | 1,70E-003 |
| 44 | GOTERM_BP_FAT | GO:0006662~glycerol ether metabolic process                 | 6  | APOA4, APOA2, APOB, APOE, CAT, LIPF                                     | 5,18E-005 | 1,82E-003 |
| 45 | GOTERM_BP_FAT | GO:0055088~lipid homeostasis                                | 6  | APOA4, APOA2, APOB, NPC2, APOE, APOM                                    | 5,18E-005 | 1,82E-003 |
| 47 | GOTERM_BP_FAT | GO:0018904~organic ether metabolic process                  | 6  | APOA4, APOA2, APOB, APOE, CAT, LIPF                                     | 6,25E-005 | 2,08E-003 |
| 49 | GOTERM_BP_FAT | GO:0016042~lipid catabolic process                          | 9  | APOA4, APOA2, APOB, PLA2G15, APOE, PLA2G12B, HSD17B4, CPT1A, LIPF       | 7,22E-005 | 2,29E-003 |
| 52 | GOTERM_BP_FAT | GO:0034375~high-density lipoprotein particle remodeling     | 4  | APOA4, APOA2, APOE, APOM                                                | 1,03E-004 | 3,05E-003 |
| 53 | GOTERM_BP_FAT | GO:0006869~lipid transport                                  | 8  | APOA4, APOA2, APOB, NPC2, APOE, ABCG4, APOM, SCP2                       | 1,59E-004 | 4,59E-003 |
| 54 | GOTERM_BP_FAT | GO:0045940~positive regulation of steroid metabolic process | 4  | APOA4, APOA2, APOE, ABCG4                                               | 1,69E-004 | 4,77E-003 |
| 55 | GOTERM_BP_FAT | GO:0019218~regulation of steroid metabolic process          | 5  | APOA4, APOA2, APOB, APOE, ABCG4                                         | 1,86E-004 | 5,13E-003 |
| 58 | GOTERM_BP_FAT | GO:0043691~reverse cholesterol transport                    | 4  | APOA4, APOA2, APOE, APOM                                                | 2,57E-004 | 6,66E-003 |
| 59 | GOTERM_BP_FAT | GO:0010876~lipid localization                               | 8  | APOA4, APOA2, APOB, NPC2, APOE, ABCG4, APOM, SCP2                       | 2,59E-004 | 6,60E-003 |

|                                    |               |                                                        |    |                                                                                                           |           |           |
|------------------------------------|---------------|--------------------------------------------------------|----|-----------------------------------------------------------------------------------------------------------|-----------|-----------|
| 60                                 | GOTERM_BP_FAT | GO:0019216~regulation of lipid metabolic process       | 7  | APOA4, APOA2, APOB, NPC2, APOE, ABCG4, APOM                                                               | 2,71E-004 | 6,77E-003 |
| <b>Other significant processes</b> |               |                                                        |    |                                                                                                           |           |           |
| 40                                 | GOTERM_BP_FAT | GO:0019748~secondary metabolic process                 | 7  | ALDH8A1, GPD1, LDHB, TYRP1, DHRS9, RPIA, OCA2                                                             | 3,90E-005 | 1,54E-003 |
| 56                                 | GOTERM_BP_FAT | GO:0016052~carbohydrate catabolic process              | 7  | GPD1, LDHB, LYVE1, GNPDA1, PKLR, MIOX, RPIA                                                               | 2,34E-004 | 0,00633   |
| 61                                 | GOTERM_BP_FAT | GO:0032101~regulation of response to external stimulus | 8  | C3, APOE, SERPINF2, F2, SERPINC1, SERPING1, PLG, AHSB                                                     | 2,80E-004 | 0,00686   |
| 62                                 | GOTERM_BP_FAT | GO:0042592~homeostatic process                         | 17 | EPAS1, HCLS1, TRIM10, PLG, APOA4, APOA2, APOB, HSP90B1, NPC2, HPX, APOE, HMOX1, F2, TXN, RGN, APOM, QSOX1 | 2,93E-004 | 7,03E-003 |

| <b>Molecular function</b>                       |               |                                                         | <b>Genes</b> | <b>P-value</b>                                                                                             | <b>Benjamini</b> |           |
|-------------------------------------------------|---------------|---------------------------------------------------------|--------------|------------------------------------------------------------------------------------------------------------|------------------|-----------|
| <b>Peptidase inhibitor activity</b>             |               |                                                         | 14           |                                                                                                            |                  |           |
| 1                                               | GOTERM_MF_FAT | GO:0004866~endopeptidase inhibitor activity             | 13           | C3, FETUB, C5, SERPING1, AHSB, AMBP, RENBP, SERPINF2, SERPINC1, SERPINA1, ITIH2, SERPIND1, ITIH3           | 1,91E-009        | 6,21E-007 |
| 2                                               | GOTERM_MF_FAT | GO:0030414~peptidase inhibitor activity                 | 13           | C3, FETUB, C5, SERPING1, AHSB, AMBP, RENBP, SERPINF2, SERPINC1, SERPINA1, ITIH2, SERPIND1, ITIH3           | 3,54E-009        | 5,75E-007 |
| 3                                               | GOTERM_MF_FAT | GO:0004857~enzyme inhibitor activity                    | 14           | C3, FETUB, C5, SERPING1, AHSB, AMBP, APOA2, RENBP, SERPINF2, SERPINC1, SERPINA1, ITIH2, SERPIND1, ITIH3    | 2,59E-007        | 2,80E-005 |
| 6                                               | GOTERM_MF_FAT | GO:0004867~serine-type endopeptidase inhibitor activity | 8            | AMBP, SERPINF2, SERPINC1, SERPING1, ITIH2, SERPINA1, SERPIND1, ITIH3                                       | 9,22E-006        | 4,99E-004 |
| <b>Lipid transport (especially cholesterol)</b> |               |                                                         | 15           |                                                                                                            |                  |           |
| 4                                               | GOTERM_MF_FAT | GO:0015248~sterol transporter activity                  | 5            | APOA4, APOA2, APOB, APOE, HSD17B4                                                                          | 3,80E-006        | 3,09E-004 |
| 11                                              | GOTERM_MF_FAT | GO:0017127~cholesterol transporter activity             | 4            | APOA4, APOA2, APOB, APOE                                                                                   | 1,07E-004        | 3,48E-003 |
| 12                                              | GOTERM_MF_FAT | GO:0005319~lipid transporter activity                   | 6            | APOA4, APOA2, APOB, APOE, HSD17B4, APOM                                                                    | 1,52E-004        | 4,49E-003 |
| 13                                              | GOTERM_MF_FAT | GO:0008201~heparin binding                              | 7            | APOB, APOE, SERPINC1, VTN, SERPIND1, COL5A3, SOD3                                                          | 1,84E-004        | 4,96E-003 |
| 14                                              | GOTERM_MF_FAT | GO:0070325~lipoprotein receptor binding                 | 4            | APOA2, APOB, HSP90B1, APOE                                                                                 | 2,18E-004        | 5,43E-003 |
| 15                                              | GOTERM_MF_FAT | GO:0043499~eukaryotic cell surface binding              | 4            | APOA4, FGG, FGA, FGB                                                                                       | 3,22E-004        | 7,45E-003 |
| <b>Protein remodelling</b>                      |               |                                                         | 17           |                                                                                                            |                  |           |
| 5                                               | GOTERM_MF_FAT | GO:0046983~protein dimerization activity                | 17           | SHBG, GPD1, TYRP1, CNBP1, EPAS1, CNBP2, PAH, MYH6, MYH9, ABCG4, AMBP, APOA4, APOA2, APOB, RENBP, APOE, CAT | 6,82E-006        | 4,43E-004 |
| 7                                               | GOTERM_MF_FAT | GO:0042803~protein homodimerization activity            | 13           | SHBG, GPD1, TYRP1, PAH, MYH6, MYH9, ABCG4, APOA4, AMBP, APOA2, RENBP, APOE, CAT                            | 1,58E-005        | 7,31E-004 |

| Other significant processes |               |                                      | 9 |                                                                 |           |           |
|-----------------------------|---------------|--------------------------------------|---|-----------------------------------------------------------------|-----------|-----------|
| 8                           | GOTERM_MF_FAT | GO:0005539~glycosaminoglycan binding | 9 | LYVE1, APOB, APOE, SERPINC1, VTN, SERPIND1, COL5A3, SOD3, HABP2 | 1,73E-005 | 7,03E-004 |
| 9                           | GOTERM_MF_FAT | GO:0030247~polysaccharide binding    | 9 | LYVE1, APOB, APOE, SERPINC1, VTN, SERPIND1, COL5A3, SOD3, HABP2 | 3,44E-005 | 0,00124   |
| 10                          | GOTERM_MF_FAT | GO:0001871~pattern binding           | 9 | LYVE1, APOB, APOE, SERPINC1, VTN, SERPIND1, COL5A3, SOD3, HABP2 | 3,44E-005 | 0,00124   |

| Cellular component | Genes | P-value | Benjamini |
|--------------------|-------|---------|-----------|
|--------------------|-------|---------|-----------|

| Extracellular space and region |  |  | 49 |  |  |  |
|--------------------------------|--|--|----|--|--|--|
|--------------------------------|--|--|----|--|--|--|

|   |               |                                      |    |                                                                                                                                                                                                                                                                                                                               |           |           |
|---|---------------|--------------------------------------|----|-------------------------------------------------------------------------------------------------------------------------------------------------------------------------------------------------------------------------------------------------------------------------------------------------------------------------------|-----------|-----------|
| 1 | GOTERM_CC_FAT | GO:0005576~extracellular region      | 49 | CNDP1, MASP2, F13A1, VTN, APOA4, APOA2, APOB, APOE, HMOX1, CFH, ITIH2, SERPINA1, ITIH3, SEPP1, APOM, SHBG, SERPING1, CTSS, CCDC134, AMBP, C8A, NPC2, F5, SERPINF2, F2, VMO1, GC, C3, C5, CPN2, AHSG, FGG, FGA, FGB, PLA2G12B, SERPINC1, C2, QSOX1, PLA2G15, CFB, FETUB, ENDOD1, COL5A3, PLG, SOD3, HPX, SERPIND1, HABP2, LIPF | 1,32E-013 | 2,70E-011 |
| 2 | GOTERM_CC_FAT | GO:0005615~extracellular space       | 29 | GC, C3, C5, VTN, AHSG, APOA4, APOB, APOA2, FGG, FGA, APOE, FGB, HMOX1, SERPINC1, CFH, SERPINA1, SEPP1, C2, APOM, QSOX1, SERPING1, PLG, SOD3, C8A, F5, HPX, SERPINF2, F2, HABP2                                                                                                                                                | 4,36E-013 | 4,47E-011 |
| 3 | GOTERM_CC_FAT | GO:0044421~extracellular region part | 30 | GC, C3, C5, VTN, AHSG, APOA4, APOB, APOA2, FGG, FGA, APOE, FGB, HMOX1, SERPINC1, CFH, SERPINA1, SEPP1, C2, APOM, QSOX1, SERPING1, COL5A3, PLG, SOD3, C8A, F5, HPX, SERPINF2, F2, HABP2                                                                                                                                        | 2,53E-010 | 1,73E-008 |

| Vesicle lumen, platelet - and secretory granules |  |  | 9 |  |  |  |
|--------------------------------------------------|--|--|---|--|--|--|
|--------------------------------------------------|--|--|---|--|--|--|

|    |               |                                                       |   |                                                              |           |           |
|----|---------------|-------------------------------------------------------|---|--------------------------------------------------------------|-----------|-----------|
| 4  | GOTERM_CC_FAT | GO:0031983~vesicle lumen                              | 9 | FGG, APOB, FGA, F5, FGB, SERPINF2, F13A1, SERPING1, SERPINA1 | 2,73E-009 | 1,40E-007 |
| 5  | GOTERM_CC_FAT | GO:0031093~platelet alpha granule lumen               | 8 | FGG, FGA, F5, FGB, SERPINF2, F13A1, SERPING1, SERPINA1       | 3,22E-008 | 1,32E-006 |
| 6  | GOTERM_CC_FAT | GO:0060205~cytoplasmic membrane-bounded vesicle lumen | 8 | FGG, FGA, F5, FGB, SERPINF2, F13A1, SERPING1, SERPINA1       | 5,39E-008 | 1,84E-006 |
| 7  | GOTERM_CC_FAT | GO:0031091~platelet alpha granule                     | 8 | FGG, FGA, F5, FGB, SERPINF2, F13A1, SERPING1, SERPINA1       | 3,01E-007 | 8,82E-006 |
| 15 | GOTERM_CC_FAT | GO:0030141~secretory granule                          | 8 | FGG, FGA, F5, FGB, SERPINF2, F13A1, SERPING1, SERPINA1       | 6,21E-004 | 0,00975   |

| Lipid -protein complex (e.g. lipoprotein) |  |  | 5 |  |  |  |
|-------------------------------------------|--|--|---|--|--|--|
|-------------------------------------------|--|--|---|--|--|--|

|   |               |                                                   |   |                                |           |           |
|---|---------------|---------------------------------------------------|---|--------------------------------|-----------|-----------|
| 8 | GOTERM_CC_FAT | GO:0034385~triglyceride-rich lipoprotein particle | 5 | APOA4, APOA2, APOB, APOE, APOM | 1,74E-005 | 4,47E-004 |
|---|---------------|---------------------------------------------------|---|--------------------------------|-----------|-----------|

|                                                  |               |                                                  |    |                                                                     |           |           |
|--------------------------------------------------|---------------|--------------------------------------------------|----|---------------------------------------------------------------------|-----------|-----------|
| 9                                                | GOTERM_CC_FAT | GO:0034361~very-low-density lipoprotein particle | 5  | APOA4, APOA2, APOB, APOE, APOM                                      | 1,74E-005 | 4,47E-004 |
| 11                                               | GOTERM_CC_FAT | GO:0042627~chylomicron                           | 4  | APOA4, APOA2, APOB, APOE                                            | 1,06E-004 | 2,17E-003 |
| 12                                               | GOTERM_CC_FAT | GO:0034358~plasma lipoprotein particle           | 5  | APOA4, APOA2, APOB, APOE, APOM                                      | 1,72E-004 | 3,20E-003 |
| 13                                               | GOTERM_CC_FAT | GO:0032994~protein-lipid complex                 | 5  | APOA4, APOA2, APOB, APOE, APOM                                      | 1,72E-004 | 3,20E-003 |
| <b>Lysosomes and vacuoles</b>                    |               |                                                  | 10 |                                                                     |           |           |
| 10                                               | GOTERM_CC_FAT | GO:0044433~cytoplasmic vesicle part              | 10 | FGG, TYRP1, APOB, FGA, F5, FGB, SERPINF2, F13A1, SERPING1, SERPINA1 | 1,95E-005 | 4,44E-004 |
| <b>Endoplasmatic reticulum and mitochondrion</b> |               |                                                  | 6  |                                                                     |           |           |
| 14                                               | GOTERM_CC_FAT | GO:0005788~endoplasmic reticulum lumen           | 6  | APOA4, CES3, APOA2, APOB, HSP90B1, CALR3                            | 4,59E-004 | 7,81E-003 |



**Table S6:** Enrichment of KEGG pathway members in the differentially expressed genes in low 1-C embryos compared to control embryos. The five most enriched pathways are listed.

| <b>Kegg pathways</b>                           | <b>Genes</b>                                                                                                             | <b>P-value</b> | <b>Benjamini</b> |
|------------------------------------------------|--------------------------------------------------------------------------------------------------------------------------|----------------|------------------|
| 1 hsa04610:Complement and coagulation cascades | 19 CFB, MASP2, C3, F13A1, C5, SERPING1, PLG, C8A, FGG, F5, FGA, FGB, SERPINF2, F2, SERPINC1, CFH, SERPINA1, SERPIND1, C2 | 6,92E-019      | 5,81E-017        |
| 2 hsa03320:PPAR signalling pathway             | 6 APOA2, SCD, FADS2, UCP1, SCP2, CPT1A                                                                                   | 2,92E-003      | 1,16E-001        |
| 3 hsa00340:Histidine metabolism                | 4 CNDP1, FTCD, HAL, UROC1                                                                                                | 7,94E-003      | 2,00E-001        |
| 4 hsa00270:Cysteine and methionine metabolism  | 4 LDHB, MAT1A, CDO1, TAT                                                                                                 | 1,23E-002      | 2,30E-001        |
| 5 hsa00120:Primary bile acid biosynthesis      | 3 HSD3B7, HSD17B4, SCP2                                                                                                  | 1,71E-001      | 3,05E-001        |
